# Supplementary material for: Linking hydraulic traits to tropical forest function in a size-structured and trait-driven model (TFS v.1-Hydro)
Source: Copernicus journal article supplement (doi:10.5194/gmd-9-4227-2016), 2016-11-24
Supplement: Supplementary file 1 [file gmd-9-4227-2016-supplement.zip]

Archive with 16 entries (16 files):
- Supplement_S2-S4.pdf
- SA_headers.csv
- leaf_PV_headers.csv
- gmd-9-4227-2016-supplement-title-page.pdf
- SA.csv
- leaf_PV_newreferences.xlsx
- XFT_headers.csv
- leaf_PV_new.csv
- XFT_newreferences.xlsx
- XFT_new.csv
- SA_references.xlsx
- Supplement_S1.pdf
- sapwood_PV_recal_uncorrected.csv
- sapwood_PV_references.xlsx
- sapwood_PV_recal_corrected.csv
- sapwood_PV_recal_headers.csv
