# Supplementary material for: Linking hydraulic traits to tropical forest function in a size-structured and trait-driven model (TFS v.1-Hydro)
Source: Copernicus journal article supplement (doi:10.5194/gmd-9-4227-2016), 2016-11-24
Supplement: Supplementary file 1 [file gmd-9-4227-2016-supplement.zip › gmd-9-4227-2016-supplement-title-page.pdf]

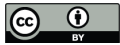

## *Supplement of*

# **Linking hydraulic traits to tropical forest function in a size-structured and trait-driven model (TFS v.1-Hydro)**

**Bradley O. Christoffersen et al.**

*Correspondence to:* Bradley O. Christoffersen ([bradley@lanl.gov](mailto:bradley@lanl.gov))

- [gmd-9-4227-2016-supplement-title-page.pdf](#)
- [SA.csv](#)
- [SA\\_headers.csv](#)
- [SA\\_references.xlsx](#)
- [Supplement\\_S1.pdf](#)
- [Supplement\\_S2-S4.pdf](#)
- [XFT\\_headers.csv](#)
- [XFT\\_new.csv](#)
- [XFT\\_newreferences.xlsx](#)
- [leaf\\_PV\\_headers.csv](#)
- [leaf\\_PV\\_new.csv](#)
- [leaf\\_PV\\_newreferences.xlsx](#)
- [sapwood\\_PV\\_recal\\_corrected.csv](#)
- [sapwood\\_PV\\_recal\\_headers.csv](#)
- [sapwood\\_PV\\_recal\\_uncorrected.csv](#)
- [sapwood\\_PV\\_references.xlsx](#)

The copyright of individual parts of the supplement might differ from the CC-BY 3.0 licence.
