# Supplementary material for: Linking hydraulic traits to tropical forest function in a size-structured and trait-driven model (TFS v.1-Hydro)
Source: Copernicus journal article supplement (doi:10.5194/gmd-9-4227-2016), 2016-11-24
Supplement: Supplementary file 1 [file gmd-9-4227-2016-supplement.zip › leaf_PV_headers.csv]

column	units	description
genus		genus (uncleaned)
species		species (uncleaned)
BaBiome		Bartlett et al.'s classification: TropicalMoist = wet, aseasonal tropical forest; TropicalDry = tropical forest with a distinct dry season; Temperate = moist temperate broadleaf forest; TemperateConifer = moist temperate conifer forest; Med/TempDry = Mediterreanean or dry temperate ecosystem; SemiDesert = vegetative system dryer than mediterreanean; Mangrove = mangrove swamp; Coastal = beach, dun…
BrBiome		Christoffersen et al.'s classification: TWF = Tropical Wet Forest; TMF = Tropical Moist Forest; TDF = Tropical Dry Forest; TS = Tropical Savanna; STF = Subtropical Forest; TFF = Tropical Flooded Forest; TM = Tropical Mangrove; G = greenhouse
Growth.form		W = woody; H = herb; F= fern; L= liana
EvgDecid		E = evergreen; D= deciduous
pinot	MPa	leaf osmotic potential at full turgor
pitlp	MPa	leaf osmotic potential at zero turgor
epsil	MPa	leaf bulk elastic modulus
apopl	-	leaf apoplastic fraction (fraction of water outside cells)
rstlp	-	leaf symplastic relative water deficit (1 - symplastic relative water content) at turgor loss point
rttlp	-	leaf total relative water deficit (1 - total relative water content) at turgor loss point
LMA	g.m-2	leaf mass per area
WD	g.cm-3	wood density (from Zanne et al. 2009 database)
Reference	-	Reference from which data originate
Compilation	-	Reference in which individual studies were compiled
