# Supplementary material for: Linking hydraulic traits to tropical forest function in a size-structured and trait-driven model (TFS v.1-Hydro)
Source: Copernicus journal article supplement (doi:10.5194/gmd-9-4227-2016), 2016-11-24
Supplement: Supplementary file 1 [file gmd-9-4227-2016-supplement.zip › leaf_PV_new.csv]

genus	species	BaBiome	BrBiome	Growth.form	EvgDecid	pinot	pitlp	epsil	apopl	rstlp	rttlp	LMA	WD	Reference	Compilation
Rhedera	trinervis	TropicalDry	TDF	W	D	-1.130940445	-1.37056928	19	NA	NA	NA	170	NA	Brodribb et al. 2003, Brodribb&Holbrook 2005	Christoffersen et al. 2016
Bursera	simaruba	TropicalDry	TDF	W	D	-1.14744352	-1.39	NA	NA	NA	NA	67.6162635914824	0.305	Brodribb etal. 2003	Christoffersen et al. 2016
Calycophyllum	candidissimum	TropicalDry	TDF	W	D	-1.071003907	-1.3	NA	NA	NA	NA	NA	0.696666667	Brodribb etal. 2003	Christoffersen et al. 2016
Enterolobium	cyclocarpum	TropicalDry	TDF	W	D	-1.512655003	-1.82	NA	NA	NA	NA	NA	0.39	Brodribb etal. 2003	Christoffersen et al. 2016
Gliricidia	sepium	TropicalDry	TDF	W	D	-1.325802616	-1.6	NA	NA	NA	0.07	NA	0.6175	Brodribb&Holbrook 2003	Christoffersen et al. 2016
Pseudobombax	septenatum	TropicalDry	TMF	W	D	-0.91	-1.28	12.8	NA	0.13	NA	128.824955169313	0.211666667	Machado & Tyree 1994	Christoffersen et al. 2016
Coursetia	ferruginea	TropicalDry	TDF	W	D	-1.97	-2.46	7.34	0.17	NA	NA	37.1	0.85	Sobrado 1986; Sobrado 1993	Christoffersen et al. 2016
Lonchocarpus	dipteroneurus	TropicalDry	TDF	W	D	-1.84	-2.32	9.54	0.17	NA	NA	41.55172414	0.6	Sobrado 1986; Sobrado 1993	Christoffersen et al. 2016
Mansoa	verrucifera	TropicalDry	TDF	W	D	-2.23	-2.51	9.94	0.177	NA	NA	57.1	NA	Sobrado 1986; Sobrado 1993	Christoffersen et al. 2016
Quercus	oleoides	TropicalDry	TDF	W	E	-2.616782742	-3.12	23.8	NA	NA	NA	180	0.86	Brodribb et al. 2003, Brodribb&Holbrook 2005	Christoffersen et al. 2016
Simarouba	glauca	TropicalDry	TDF	W	E	-1.843893324	-2.21	10.8	NA	NA	NA	160	0.414188909	Brodribb et al. 2003, Brodribb&Holbrook 2005	Christoffersen et al. 2016
Hymenaea	courbaril	TropicalDry	TDF	W	E	-1.813322953	-2.174006445	NA	NA	NA	NA	NA	0.792334	Brodribb etal. 2003	Christoffersen et al. 2016
Sweitenia	macrophylla	TropicalDry	TDF	W	E	-1.792933582	-2.15	NA	NA	NA	NA	NA	NA	Brodribb etal. 2003	Christoffersen et al. 2016
Ochroma	pyramidale	TropicalDry	TMF	W	E	-1.37	-1.6	25.74	NA	0.05	NA	NA	0.157516429	Machado & Tyree 1994	Christoffersen et al. 2016
Capparis	verrucosa	TropicalDry	TDF	W	E	-2.97	-3.65	14.4	0.226	NA	NA	112.4	0.86	Sobrado 1986; Sobrado 1993	Christoffersen et al. 2016
Morisonia	americana	TropicalDry	TDF	W	E	-3.28	-4.08	13.9	0.161	NA	NA	150.6428571	0.6	Sobrado 1986; Sobrado 1993	Christoffersen et al. 2016
Balfourodendron	riedelianum	TropicalMoist	STF	W	D	-1.86	-2.27	NA	NA	NA	NA	53.1	0.666457143	Villagra et al. 2013	Christoffersen et al. 2016
Cedrela	fissilis	TropicalMoist	STF	W	D	-1	-1.28	NA	NA	NA	NA	32	0.4666	Villagra et al. 2013	Christoffersen et al. 2016
Peltophorum	dubium	TropicalMoist	STF	W	D	-1.1	-1.36	NA	NA	NA	NA	30.5	0.74388	Villagra et al. 2013	Christoffersen et al. 2016
Anacardium	excelsum	TropicalMoist	TMF	W	E	-0.926617972	-1.13	NA	NA	NA	NA	92.7528381691712	0.43	Johnson et al. 2013 AmJBot	Christoffersen et al. 2016
Prionostemma	aspera	TropicalMoist	TMF	L	E	-1.72498726	-2.07	NA	NA	NA	NA	NA	0.58	Johnson et al. 2013 AmJBot	Christoffersen et al. 2016
Trichostigma	octandrum	TropicalMoist	TMF	L	E	-1.232376423	-1.49	NA	NA	NA	NA	NA	0.49	Johnson et al. 2013 AmJBot	Christoffersen et al. 2016
Anacardium	excelsum	TropicalMoist	TMF	W	E	-0.811958553	-0.995	NA	NA	NA	NA	92.7528381691712	0.384560171	McCulloh et al. 2012	Christoffersen et al. 2016
Miconia	argentea	TropicalMoist	TMF	W	E	-1.504161712	-1.81	NA	NA	NA	NA	NA	0.541821562	McCulloh et al. 2012	Christoffersen et al. 2016
Chrysophllum	cainito	TropicalMoist	TMF	W	E	-2.430152331	-2.900261354	NA	NA	NA	NA	NA	0.6596	Meinzer et al. 2008 Oecologia	Christoffersen et al. 2016
Ficus	insipida	TropicalMoist	TMF	W	E	-1.69802898	-2.038259321	NA	NA	NA	NA	NA	0.3994	Meinzer et al. 2008 Oecologia	Christoffersen et al. 2016
Manilkara	bidentata	TropicalMoist	TWF	W	E	-2.558541164	-3.051426366	NA	NA	NA	NA	NA	0.6701	Meinzer et al. 2008 Oecologia	Christoffersen et al. 2016
Protium	panamense	TropicalMoist	TWF	W	E	-2.228362288	-2.662673758	NA	NA	NA	NA	NA	0.6199	Meinzer et al. 2008 Oecologia	Christoffersen et al. 2016
Tachigalia	versicolor	TropicalMoist	TWF	W	E	-1.955507622	-2.341414674	NA	NA	NA	NA	NA	0.6403	Meinzer et al. 2008 Oecologia	Christoffersen et al. 2016
Tapirira	guianensis	TropicalMoist	TWF	W	E	-1.825723328	-2.188606647	NA	NA	NA	NA	NA	0.4998	Meinzer et al. 2008 Oecologia	Christoffersen et al. 2016
Trattinnickia	aspera	TropicalMoist	TWF	W	E	-2.121411619	-2.53675004	NA	NA	NA	NA	NA	0.5696	Meinzer et al. 2008 Oecologia	Christoffersen et al. 2016
Vochysia	ferruginea	TropicalMoist	TWF	W	E	-1.921250695	-2.301080569	NA	NA	NA	NA	NA	0.5598	Meinzer et al. 2008 Oecologia	Christoffersen et al. 2016
Aspidosperma	cruenta	TropicalMoist	TWF	W	E	-2.32986071	-2.782178	NA	NA	NA	NA	NA	0.7401	Meinzer et al. 2008 Tree Physiology	Christoffersen et al. 2016
Catostemma	sancarlosianum	TropicalMoist	TWF	W	E	-1.6	-1.89	NA	0.43	0.08	NA	NA	0.67	Sobrado 2009	Christoffersen et al. 2016
Heteropterys	sp.	TropicalMoist	TWF	W	E	-1.35	-1.97	NA	0.16	0.26	NA	NA	0.61	Sobrado 2009	Christoffersen et al. 2016
Pachira	sordida	TropicalMoist	TWF	W	E	-1.55	-1.98	NA	0.4	0.13	NA	NA	0.63	Sobrado 2009	Christoffersen et al. 2016
Remijia	morilloi	TropicalMoist	TWF	W	E	-1.41	-1.95	NA	0.21	0.22	NA	354.813389233575	0.61	Sobrado 2009	Christoffersen et al. 2016
Retiniphyllum	concolor	TropicalMoist	TWF	W	E	-1.5	-1.87	NA	0.18	0.16	NA	162.181009735893	0.55	Sobrado 2009	Christoffersen et al. 2016
Caryocar	glabrum	TropicalMoist	TWF	W	E	-1.09	-1.28	NA	0.28	NA	0.991	NA	0.653571428571429	Sobrado 2012	Christoffersen et al. 2016
Ocotea	aciphylla	TropicalMoist	TWF	W	E	-1.29	-1.5	NA	0.27	NA	0.9911	NA	0.5105	Sobrado 2012	Christoffersen et al. 2016
Eperua	leucantha	TropicalMoist	TWF	W	E	-1.19	-1.36	NA	0.24	NA	0.9912	104.71285480509	NA	Sobrado 2012	Christoffersen et al. 2016
Micranda	sprucei	TropicalMoist	TWF	W	E	-0.75	-1.12	NA	0.33	NA	0.9925	NA	NA	Sobrado 2012	Christoffersen et al. 2016
Cordia	americana	TropicalMoist	STF	W	E	-1.36	-1.58	NA	NA	NA	NA	56.9	0.688	Villagra et al. 2013	Christoffersen et al. 2016
Maclura	tinctoria	TropicalMoist	STF	W	E	-1.55	-1.85	NA	NA	NA	NA	41.7	0.794526667	Villagra et al. 2013	Christoffersen et al. 2016
Hybanthus	prunifolius	TropicalMoist	TMF	W	E	-1.218507321	-1.74	NA	NA	NA	NA	32.46753247	0.67	Tobin et al. 1999	Christoffersen et al. 2016
Psychotria	horizontalis	TropicalMoist	TMF	W	E	-1.013010062	-1.86	NA	NA	NA	NA	43.29004329	0.56362	Tobin et al. 1999	Christoffersen et al. 2016
Alseis	blackiana	TropicalMoist	TMF	W	E	-1.14425766	-2.04	NA	NA	NA	NA	28.57142857	0.535989568	Tobin et al. 1999	Christoffersen et al. 2016
Swartzia	simplex	TropicalMoist	TMF	W	E	-1.621530637	-1.88	NA	NA	NA	NA	63.69426752	0.841537052	Tobin et al. 1999	Christoffersen et al. 2016
Ouratea	lucens	TropicalMoist	TMF	W	E	-1.622856426	-1.84	NA	NA	NA	NA	81.30081301	0.726990909	Tobin et al. 1999	Christoffersen et al. 2016
Licania	platypus	TropicalMoist	TMF	W	E	-1.142937361	-1.41	NA	NA	NA	NA	68.02721088	0.62	Tobin et al. 1999	Christoffersen et al. 2016
Cordia	alliodora	TropicalDry	TDF	W	D	-1.93	-2.16	12.84	NA	NA	0.9911	NA	0.520307692307692	Choat et al. 2007	Christoffersen et al. 2016
Cordia	dentata	TropicalDry	TDF	W	D	-1.88	-2.14	11.86	NA	NA	0.9911	NA	0.5	Choat et al. 2007	Christoffersen et al. 2016
Cordia	collococca	TropicalDry	TDF	W	D	-1.8	-2.09	9.01	NA	NA	0.9914	NA	0.42	Choat et al. 2007	Christoffersen et al. 2016
Cordia	alliodora	TropicalMoist	TMF	W	D	-1.71	-1.89	14.16	NA	NA	0.9908	NA	0.520307692307692	Choat et al. 2007	Christoffersen et al. 2016
Cordia	lasiocalyx	TropicalMoist	TMF	W	E	-1.48	-1.63	11.96	NA	NA	0.9909	NA	0.397	Choat et al. 2007	Christoffersen et al. 2016
Cordia	panamensis	TropicalMoist	TMF	W	E	-1.79	-2	12.46	NA	NA	0.991	NA	NA	Choat et al. 2007	Christoffersen et al. 2016
Cordia	alliodora	TropicalMoist	TWF	W	D	-1.64	-1.86	12.16	NA	NA	0.9907	NA	0.520307692307692	Choat et al. 2007	Christoffersen et al. 2016
Cordia	cymosa	TropicalMoist	TWF	W	E	-1.34	-1.5	11.13	NA	NA	0.9907	NA	NA	Choat et al. 2007	Christoffersen et al. 2016
Cordia	lucidula	TropicalMoist	TWF	W	E	-1.29	-1.4	10.46	NA	NA	0.9908	NA	NA	Choat et al. 2007	Christoffersen et al. 2016
