# Supplementary material for: Linking hydraulic traits to tropical forest function in a size-structured and trait-driven model (TFS v.1-Hydro)
Source: Copernicus journal article supplement (doi:10.5194/gmd-9-4227-2016), 2016-11-24
Supplement: Supplementary file 1 [file gmd-9-4227-2016-supplement.zip › leaf_PV_newreferences.xlsx]

## Sheet: sapwood_PV_references
Reference	Full Citation	DOI
Brodribb et al. 2003	Brodribb, T. J., Holbrook, N. M., Edwards, E. J., and Gutierrez, M. V.: Relations between stomatal closure, leaf turgor and xylem vulnerability in eight tropical dry forest trees, Plant Cell and Environment, 26, 443-450, 2003.	10.1046/j.1365-3040.2003.00975.x
Brodribb&Holbrook 2005	Brodribb, T. J. and Holbrook, N. M.: Leaf physiology does not predict leaf habit; examples from tropical dry forest, Trees-Structure and Function, 19, 290-295, 2005.	10.1007/s00468-004-0390-3
Brodribb&Holbrook 2003	Brodribb, T. J. and Holbrook, N. M.: Stomatal closure during leaf dehydration, correlation with other leaf physiological traits, Plant Physiology, 132, 2166-2173, 2003.	10.​1104/​pp.​103.​023879
Machado & Tyree 1994	Machado, J.-L. and Tyree, M. T.: Patterns of hydraulic architecture and water relations of two tropical canopy trees with contrasting leaf phenologies: Ochroma pyramidale and Pseudobombax septenatum, Tree Physiology, 14, 219-240, 1994.	10.1093/treephys/14.3.219
Sobrado 1986	Sobrado, M. A.: Aspects of tissue water relations and seasonal changes of leaf water potential components of evergreen and deciduous species coexisting in tropical dry forests, Oecologia, 68, 413-416, 1986.	10.1007/BF01036748
Sobrado 1993	Sobrado, M. A.: Trade-off between water transport efficiency and leaf life-span in a tropical dry forest, Oecologia, 96, 19-23, 1993.	10.1007/BF00318025
Villagra et al. 2013	Villagra, M., Campanello, P. I., Bucci, S. J., and Goldstein, G.: Functional relationships between leaf hydraulics and leaf economic traits in response to nutrient addition in subtropical tree species, Tree Physiol, 33, 1308-1318, 2013.	10.1093/treephys/tpt098
Johnson et al. 2013 AmJBot	Johnson, D. M., Domec, J. C., Woodruff, D. R., McCulloh, K. A., and Meinzer, F. C.: Contrasting hydraulic strategies in two tropical lianas and their host trees, Am J Bot, 100, 374-383, 2013.	10.3732/ajb.1200590
McCulloh et al. 2012	McCulloh, K. A., Meinzer, F. C., Sperry, J. S., Lachenbruch, B., Voelker, S., Woodruff, D. R., and Domec, J. C.: Comparative hydraulic architecture of tropical tree species representing a range of successional stages and wood density, Oecologia, 167, 27-37, 2011.	10.1007/s00442-011-1973-5
Meinzer et al. 2008 Oecologia	Meinzer, F. C., Woodruff, D. R., Domec, J. C., Goldstein, G., Campanello, P. I., Gatti, M. G., and Villalobos-Vega, R.: Coordination of leaf and stem water transport properties in tropical forest trees, Oecologia, 156, 31-41, 2008.	10.1007/s00442-008-0974-5
Meinzer et al. 2008 Tree Physiology	Meinzer, F. C., Campanello, P. I., Domec, J. C., Gatti, M. G., Goldstein, G., Villalobos-Vega, R., and Woodruff, D. R.: Constraints on physiological function associated with branch architecture and wood density in tropical forest trees, Tree Physiology, 28, 1609-1617, 2008.	10.1093/treephys/28.11.1609
Sobrado 2009	Sobrado, M. A.: Leaf tissue water relations and hydraulic properties of sclerophyllous vegetation on white sands of the upper Rio Negro in the Amazon region, J. Trop. Ecol., 25, 271, 2009.	10.1017/s026646740900604x
Sobrado 2012	Sobrado, M. A.: Leaf tissue water relations in tree species from contrasting habitats within the upper Rio Negro forests of the Amazon region, J. Trop. Ecol., 28, 519-522, 2012.	10.1017/s0266467412000454
Tobin et al. 1999	Tobin, M. F., Lopez, O. R., and Kursar, T. A.: Responses of Tropical Understory Plants to a Severe Drought: Tolerance and Avoidance of Water Stress, Biotropica, 31, 570-578, 1999.	10.1111/j.1744-7429.1999.tb00404.x
