# Supplementary material for: Linking hydraulic traits to tropical forest function in a size-structured and trait-driven model (TFS v.1-Hydro)
Source: Copernicus journal article supplement (doi:10.5194/gmd-9-4227-2016), 2016-11-24
Supplement: Supplementary file 1 [file gmd-9-4227-2016-supplement.zip › SA.csv]

genus	species	Forest Type	DBH	H	SA	Reference
Alstonia	scholaris	natural forest	26.7	22.2	386.1	Apgaua et al. 2015
Alstonia	scholaris	natural forest	20.6	16.2	216.39	Apgaua et al. 2015
Alstonia	scholaris	natural forest	27.1	22.7	311.14	Apgaua et al. 2015
Alstonia	scholaris	natural forest	20.5	15.9	214.97	Apgaua et al. 2015
Elaeocarpus	angustifolius	natural forest	35.4	19.9	417.13	Apgaua et al. 2015
Elaeocarpus	angustifolius	natural forest	46.9	28	785.67	Apgaua et al. 2015
Elaeocarpus	angustifolius	natural forest	19.3	16	176.55	Apgaua et al. 2015
Elaeocarpus	angustifolius	natural forest	26.9	19.7	246.07	Apgaua et al. 2015
Argyrodendron	peralatum	natural forest	32.2	34.8	184.58	Apgaua et al. 2015
Argyrodendron	peralatum	natural forest	36.8	25.2	372.33	Apgaua et al. 2015
Argyrodendron	peralatum	natural forest	34.3	25.6	252.1	Apgaua et al. 2015
Argyrodendron	peralatum	natural forest	40.4	29.9	362.26	Apgaua et al. 2015
Castanospermum	australe	natural forest	43.5	29.7	541.4	Apgaua et al. 2015
Castanospermum	australe	natural forest	127.1	33	2321.63	Apgaua et al. 2015
Endiandra	microneura	natural forest	14.7	16.4	70.67	Apgaua et al. 2015
Endiandra	microneura	natural forest	46	23.4	414.57	Apgaua et al. 2015
Endiandra	microneura	natural forest	40.5	24.7	505.29	Apgaua et al. 2015
Endiandra	microneura	natural forest	30.5	24.9	300.93	Apgaua et al. 2015
Myrsitica	globosa	natural forest	39.5	26.8	476.61	Apgaua et al. 2015
Myrsitica	globosa	natural forest	29.2	20.2	341.68	Apgaua et al. 2015
Myrsitica	globosa	natural forest	30.9	16.6	284.66	Apgaua et al. 2015
Myrsitica	globosa	natural forest	34.4	23.2	438.43	Apgaua et al. 2015
Syzygium	graveolens	natural forest	56.8	30.6	1079.27	Apgaua et al. 2015
Syzygium	graveolens	natural forest	48.9	28.6	547.57	Apgaua et al. 2015
Syzygium	graveolens	natural forest	64.8	26.3	765.34	Apgaua et al. 2015
Syzygium	graveolens	natural forest	46.4	26	585.93	Apgaua et al. 2015
Normanbya	normanbyi	natural forest	14.2	16.6	157.96	Apgaua et al. 2015
Normanbya	normanbyi	natural forest	14.6	18.2	167	Apgaua et al. 2015
Normanbya	normanbyi	natural forest	15	14.8	172.58	Apgaua et al. 2015
Normanbya	normanbyi	natural forest	14.9	16.9	148.22	Apgaua et al. 2015
Tetragastris	panamensis	natural forest	8.42479721314228	6.981979844	21.2069653084295	Calvo-Alvarado et al. 2008
Tetragastris	panamensis	natural forest	8.93078816924861	8.37350794	42.5199750817701	Calvo-Alvarado et al. 2008
Tetragastris	panamensis	natural forest	8.92293809683496	9.000773609	24.982172668854	Calvo-Alvarado et al. 2008
Tetragastris	panamensis	natural forest	10.8079706145416	10.55607223	58.0171515883925	Calvo-Alvarado et al. 2008
Tetragastris	panamensis	natural forest	10.3299658922894	12.87563327	45.8924425097563	Calvo-Alvarado et al. 2008
Tetragastris	panamensis	natural forest	12.4485207703424	14.37634172	46.8596487874234	Calvo-Alvarado et al. 2008
Tetragastris	panamensis	natural forest	15.3764002399348	15.27655825	79.2700421942072	Calvo-Alvarado et al. 2008
Tetragastris	panamensis	natural forest	14.6651575305609	17.45912254	55.7520948190381	Calvo-Alvarado et al. 2008
Tetragastris	panamensis	natural forest	36.536099476789	18.05961444	169.596368492029	Calvo-Alvarado et al. 2008
Tetragastris	panamensis	natural forest	16.6692365443143	18.46851942	77.9507838294697	Calvo-Alvarado et al. 2008
Tetragastris	panamensis	natural forest	23.8394814998098	20.9796674	76.0554652417299	Calvo-Alvarado et al. 2008
Tetragastris	panamensis	natural forest	30.8808831212548	21.57911665	173.928442231506	Calvo-Alvarado et al. 2008
Tetragastris	panamensis	natural forest	29.6529030078932	22.53392336	120.533295172386	Calvo-Alvarado et al. 2008
Tetragastris	panamensis	natural forest	31.663146506617	24.2529925	131.359692653372	Calvo-Alvarado et al. 2008
Virola	koshnii	natural forest	19.5152614809386	13.90654686	164.73556867224	Calvo-Alvarado et al. 2008
Virola	koshnii	natural forest	29.9658402902601	18.164385	130.518934389494	Calvo-Alvarado et al. 2008
Virola	koshnii	natural forest	36.152276293988	24.71302281	143.790814449331	Calvo-Alvarado et al. 2008
Virola	koshnii	natural forest	24.0481890712097	26.81579809	386.044814123753	Calvo-Alvarado et al. 2008
Virola	koshnii	natural forest	34.4702098995487	30.64362723	244.92050730676	Calvo-Alvarado et al. 2008
Virola	koshnii	natural forest	34.0280697531486	31.96481588	274.124842840333	Calvo-Alvarado et al. 2008
Virola	koshnii	natural forest	46.2537897047788	32.7725463	535.659850320355	Calvo-Alvarado et al. 2008
Virola	koshnii	natural forest	35.7031353357327	34.30957575	327.272311144276	Calvo-Alvarado et al. 2008
Virola	koshnii	natural forest	48.2595034291266	34.95542557	267.150021556179	Calvo-Alvarado et al. 2008
Virola	koshnii	natural forest	56.2900080901942	39.94256275	364.507832093349	Calvo-Alvarado et al. 2008
Carapa	guianensis	natural forest	23.520757226004	19.00572886	284.737667486928	Calvo-Alvarado et al. 2008
Carapa	guianensis	natural forest	28.3988890129019	21.89362371	251.711705810279	Calvo-Alvarado et al. 2008
Carapa	guianensis	natural forest	45.5680678656316	26.70747392	378.612003585595	Calvo-Alvarado et al. 2008
Carapa	guianensis	natural forest	36.9399149063052	27.50874409	820.498584655474	Calvo-Alvarado et al. 2008
Carapa	guianensis	natural forest	70.3325164509772	32.24122146	1001.8376631316	Calvo-Alvarado et al. 2008
Carapa	guianensis	natural forest	38.5358189080378	32.50900364	290.711714364315	Calvo-Alvarado et al. 2008
Carapa	guianensis	natural forest	46.185667738556	34.11362038	708.162397670619	Calvo-Alvarado et al. 2008
Carapa	guianensis	natural forest	60.9868771647367	34.7006648	773.258875048053	Calvo-Alvarado et al. 2008
Carapa	guianensis	natural forest	39.3069041719432	35.10129989	663.165265302997	Calvo-Alvarado et al. 2008
Carapa	guianensis	natural forest	52.8402306171129	35.20841276	596.970219224124	Calvo-Alvarado et al. 2008
Carapa	guianensis	natural forest	64.4092217418912	36.49376727	805.763787135339	Calvo-Alvarado et al. 2008
Carapa	guianensis	natural forest	92.346899881189	40.10155944	1066.76559856756	Calvo-Alvarado et al. 2008
Carapa	guianensis	natural forest	72.7327501303018	40.82353315	877.428822167875	Calvo-Alvarado et al. 2008
Carapa	guianensis	natural forest	62.0717962944673	41.97395836	1198.58847793533	Calvo-Alvarado et al. 2008
Vochysia	ferruginea	natural forest	16.7113650884583	19.40690858	351.229300966256	Calvo-Alvarado et al. 2008
Vochysia	ferruginea	natural forest	50.551720048786	22.70396303	637.106034651692	Calvo-Alvarado et al. 2008
Vochysia	ferruginea	natural forest	32.5213287356415	25.30499544	600.386313683528	Calvo-Alvarado et al. 2008
Vochysia	ferruginea	natural forest	49.8970338760569	25.86776499	907.118363932054	Calvo-Alvarado et al. 2008
Vochysia	ferruginea	natural forest	46.0962516009761	30.26448532	842.681537327593	Calvo-Alvarado et al. 2008
Vochysia	ferruginea	natural forest	58.399852635304	31.3343916	426.296228176584	Calvo-Alvarado et al. 2008
Vochysia	ferruginea	natural forest	109.582991556803	31.64875663	1654.33250011711	Calvo-Alvarado et al. 2008
Vochysia	ferruginea	natural forest	131.991902849624	33.88367756	1016.20445190018	Calvo-Alvarado et al. 2008
Vochysia	ferruginea	natural forest	42.00843550951	34.39275748	515.30713140101	Calvo-Alvarado et al. 2008
Vochysia	ferruginea	natural forest	48.8835693057797	34.74271169	399.459031929647	Calvo-Alvarado et al. 2008
Vochysia	ferruginea	natural forest	64.4215634743355	36.9918467	556.78319786276	Calvo-Alvarado et al. 2008
Vochysia	ferruginea	natural forest	87.0735015633854	40.0760858	667.921868969507	Calvo-Alvarado et al. 2008
Pentaclethra	macroloba	natural forest	23.2388033203524	17.99761737	144.920690059079	Calvo-Alvarado et al. 2008
Pentaclethra	macroloba	natural forest	67.6352520742852	27.17748923	564.385520156076	Calvo-Alvarado et al. 2008
Pentaclethra	macroloba	natural forest	40.5708112444459	27.59127736	284.981176224666	Calvo-Alvarado et al. 2008
Pentaclethra	macroloba	natural forest	52.0501797935919	28.28026555	401.545804986191	Calvo-Alvarado et al. 2008
Pentaclethra	macroloba	natural forest	59.217948562897	30.01689125	562.144479255745	Calvo-Alvarado et al. 2008
Pentaclethra	macroloba	natural forest	58.1780832315692	30.37504655	547.111150293351	Calvo-Alvarado et al. 2008
Pentaclethra	macroloba	natural forest	94.1721237903264	31.59106455	772.966278315393	Calvo-Alvarado et al. 2008
Pentaclethra	macroloba	natural forest	67.5675817047721	32.30490512	628.840080132497	Calvo-Alvarado et al. 2008
Pentaclethra	macroloba	natural forest	89.7338078155048	32.44299916	702.427285512294	Calvo-Alvarado et al. 2008
Pentaclethra	macroloba	natural forest	107.630165315153	33.24226499	885.811262931221	Calvo-Alvarado et al. 2008
Pentaclethra	macroloba	natural forest	65.4280301194252	34.51045776	593.877519964834	Calvo-Alvarado et al. 2008
Pentaclethra	macroloba	natural forest	140.579522352193	37.01902689	1272.43822068056	Calvo-Alvarado et al. 2008
NA	NA	natural forest	15.26098901	NA	99.0224731830564	Meinzer et al. 2001
NA	NA	natural forest	17.67857143	NA	137.470701637115	Meinzer et al. 2001
NA	NA	natural forest	13.2967033	NA	130.170376767544	Meinzer et al. 2001
NA	NA	natural forest	19.94505495	NA	213.635926650719	Meinzer et al. 2001
NA	NA	natural forest	22.36263736	NA	301.936743744064	Meinzer et al. 2001
NA	NA	natural forest	26.29120879	NA	353.962442160937	Meinzer et al. 2001
NA	NA	natural forest	27.5	NA	337.861079911949	Meinzer et al. 2001
NA	NA	natural forest	29.91758242	NA	380.234096049531	Meinzer et al. 2001
NA	NA	natural forest	34.75274725	NA	465.421982586257	Meinzer et al. 2001
NA	NA	natural forest	20.54945055	NA	287.498653423355	Meinzer et al. 2001
NA	NA	natural forest	34.45054945	NA	595.865627766099	Meinzer et al. 2001
NA	NA	natural forest	30.21978022	NA	535.261369823156	Meinzer et al. 2001
NA	NA	natural forest	18.88736264	NA	270.164081084857	Meinzer et al. 2001
NA	NA	natural forest	21.60714286	NA	342.289243708833	Meinzer et al. 2001
NA	NA	natural forest	23.57142857	NA	398.755012452902	Meinzer et al. 2001
NA	NA	natural forest	26.74450549	NA	483.321456521752	Meinzer et al. 2001
NA	NA	natural forest	24.93131868	NA	450.305378482324	Meinzer et al. 2001
NA	NA	natural forest	31.88186813	NA	644.287642521361	Meinzer et al. 2001
NA	NA	natural forest	19.34065934	NA	293.367255424895	Meinzer et al. 2001
NA	NA	natural forest	22.81593407	NA	402.375848005116	Meinzer et al. 2001
NA	NA	natural forest	21.60714286	NA	366.125774930422	Meinzer et al. 2001
NA	NA	natural forest	23.87362637	NA	438.474529977245	Meinzer et al. 2001
NA	NA	natural forest	25.08241758	NA	473.364278508864	Meinzer et al. 2001
NA	NA	natural forest	25.08241758	NA	486.149528278932	Meinzer et al. 2001
NA	NA	natural forest	26.14010989	NA	522.524076824802	Meinzer et al. 2001
NA	NA	natural forest	27.0467033	NA	551.126686242064	Meinzer et al. 2001
NA	NA	natural forest	28.1043956	NA	583.745552480584	Meinzer et al. 2001
NA	NA	natural forest	31.57967033	NA	689.5491517491	Meinzer et al. 2001
NA	NA	natural forest	32.33516484	NA	715.929662142024	Meinzer et al. 2001
NA	NA	natural forest	33.09065934	NA	754.099179150067	Meinzer et al. 2001
NA	NA	natural forest	37.01923077	NA	855.199951441147	Meinzer et al. 2001
NA	NA	natural forest	39.89010989	NA	949.558576422858	Meinzer et al. 2001
NA	NA	natural forest	43.36538462	NA	1041.6542069493	Meinzer et al. 2001
NA	NA	natural forest	43.06318681	NA	1117.63372187544	Meinzer et al. 2001
NA	NA	natural forest	49.10714286	NA	1298.2782865635	Meinzer et al. 2001
NA	NA	natural forest	51.97802198	NA	1410.0805660311	Meinzer et al. 2001
NA	NA	natural forest	46.68956044	NA	1305.47189406147	Meinzer et al. 2001
NA	NA	natural forest	46.53846154	NA	1328.4949478405	Meinzer et al. 2001
NA	NA	natural forest	53.48901099	NA	1598.51988876442	Meinzer et al. 2001
NA	NA	natural forest	56.81318681	NA	1763.48822336905	Meinzer et al. 2001
NA	NA	natural forest	50.01373626	NA	1538.10242187558	Meinzer et al. 2001
NA	NA	natural forest	45.63186813	NA	1335.72176272922	Meinzer et al. 2001
NA	NA	natural forest	37.01923077	NA	954.453357241666	Meinzer et al. 2001
NA	NA	natural forest	29.31318681	NA	639.616438347716	Meinzer et al. 2001
NA	NA	natural forest	29.31318681	NA	643.815247135597	Meinzer et al. 2001
NA	NA	natural forest	27.3489011	NA	578.395386069154	Meinzer et al. 2001
NA	NA	natural forest	27.3489011	NA	578.935914738606	Meinzer et al. 2001
NA	NA	natural forest	23.11813187	NA	419.200771597727	Meinzer et al. 2001
NA	NA	natural forest	20.24725275	NA	284.542953366805	Meinzer et al. 2001
NA	NA	natural forest	22.36263736	NA	372.379677791807	Meinzer et al. 2001
NA	NA	natural forest	26.74450549	NA	561.350028465692	Meinzer et al. 2001
NA	NA	natural forest	26.59340659	NA	555.347007553633	Meinzer et al. 2001
NA	NA	natural forest	27.5	NA	593.955613564754	Meinzer et al. 2001
NA	NA	natural forest	28.55769231	NA	640.25044693926	Meinzer et al. 2001
NA	NA	natural forest	28.70879121	NA	647.235027760326	Meinzer et al. 2001
NA	NA	natural forest	31.12637363	NA	754.068707302465	Meinzer et al. 2001
NA	NA	natural forest	33.39285714	NA	854.341151408521	Meinzer et al. 2001
NA	NA	natural forest	37.17032967	NA	1002.759249135	Meinzer et al. 2001
NA	NA	natural forest	36.86813187	NA	997.80604777168	Meinzer et al. 2001
NA	NA	natural forest	37.17032967	NA	1021.42832340652	Meinzer et al. 2001
NA	NA	natural forest	38.22802198	NA	1074.58042631376	Meinzer et al. 2001
NA	NA	natural forest	35.05494505	NA	938.169194911164	Meinzer et al. 2001
NA	NA	natural forest	35.05494505	NA	944.39243312576	Meinzer et al. 2001
NA	NA	natural forest	33.09065934	NA	859.028495421425	Meinzer et al. 2001
NA	NA	natural forest	37.77472527	NA	1094.25808555598	Meinzer et al. 2001
NA	NA	natural forest	40.6456044	NA	1160.5759527952	Meinzer et al. 2001
NA	NA	natural forest	41.7032967	NA	1234.71456910928	Meinzer et al. 2001
NA	NA	natural forest	39.28571429	NA	1182.12732833499	Meinzer et al. 2001
NA	NA	natural forest	40.7967033	NA	1256.86956615948	Meinzer et al. 2001
NA	NA	natural forest	48.50274725	NA	1551.37105880336	Meinzer et al. 2001
NA	NA	natural forest	51.07142857	NA	1742.81738010152	Meinzer et al. 2001
NA	NA	natural forest	60.59065934	NA	2215.77322204512	Meinzer et al. 2001
NA	NA	natural forest	53.94230769	NA	1947.13692211802	Meinzer et al. 2001
NA	NA	natural forest	50.76923077	NA	1790.23307445798	Meinzer et al. 2001
NA	NA	natural forest	48.04945055	NA	1658.70635972661	Meinzer et al. 2001
NA	NA	natural forest	40.34340659	NA	1255.49138960845	Meinzer et al. 2001
NA	NA	natural forest	41.4010989	NA	1334.41614303582	Meinzer et al. 2001
NA	NA	natural forest	43.51648352	NA	1462.83111197928	Meinzer et al. 2001
NA	NA	natural forest	44.72527473	NA	1537.0116425082	Meinzer et al. 2001
NA	NA	natural forest	45.78296703	NA	1579.95864242119	Meinzer et al. 2001
NA	NA	natural forest	48.50274725	NA	1752.90859544339	Meinzer et al. 2001
NA	NA	natural forest	52.58241758	NA	1930.00183505498	Meinzer et al. 2001
NA	NA	natural forest	53.64010989	NA	2028.65425035307	Meinzer et al. 2001
NA	NA	natural forest	56.66208791	NA	2195.19775667501	Meinzer et al. 2001
NA	NA	natural forest	56.96428571	NA	2212.40861725045	Meinzer et al. 2001
NA	NA	natural forest	56.66208791	NA	2251.82264302472	Meinzer et al. 2001
NA	NA	natural forest	52.28021978	NA	2031.88596291439	Meinzer et al. 2001
NA	NA	natural forest	56.05769231	NA	2313.76266801571	Meinzer et al. 2001
NA	NA	natural forest	51.67582418	NA	2076.8658165836	Meinzer et al. 2001
NA	NA	natural forest	63.00824176	NA	2886.60819796384	Meinzer et al. 2001
NA	NA	natural forest	64.36813187	NA	2904.41436100616	Meinzer et al. 2001
NA	NA	natural forest	66.33241758	NA	2987.96628701963	Meinzer et al. 2001
NA	NA	natural forest	70.71428571	NA	2932.94909083371	Meinzer et al. 2001
NA	NA	natural forest	74.18956044	NA	3253.46895884397	Meinzer et al. 2001
NA	NA	natural forest	67.84340659	NA	3167.89008664914	Meinzer et al. 2001
NA	NA	natural forest	69.0521978	NA	3416.88433527009	Meinzer et al. 2001
NA	NA	natural forest	69.50549451	NA	3461.54281470389	Meinzer et al. 2001
NA	NA	natural forest	72.37637363	NA	3754.57597885155	Meinzer et al. 2001
NA	NA	natural forest	73.28296703	NA	3608.16968947511	Meinzer et al. 2001
NA	NA	natural forest	76.75824176	NA	3845.79013477377	Meinzer et al. 2001
NA	NA	natural forest	79.62912088	NA	4088.07126564681	Meinzer et al. 2001
NA	NA	natural forest	95.6456044	NA	5103.33229792905	Meinzer et al. 2001
NA	NA	natural forest	100.1785714	NA	5344.44579129301	Meinzer et al. 2001
NA	NA	natural forest	102.1428571	NA	5627.97197614188	Meinzer et al. 2001
Anacardium	excelsum	natural forest	101.8	35	5100	Andrade et al. 1998
Cecropia	longipes	natural forest	19.7	18	200	Andrade et al. 1998
Ficus	insipida	natural forest	56.7	30	2100	Andrade et al. 1998
Luehea	seemannii	natural forest	38.2	29	1000	Andrade et al. 1998
Spondias	mombin	natural forest	33.1	23	600	Andrade et al. 1998
Myrtaceae	sp.	natural forest	11.25358712	NA	22.1309471	Horna et al. 2011
Myrtaceae	sp.	natural forest	11.54465593	NA	23.71373706	Horna et al. 2011
Canarium	balsamiferum	natural forest	10.37306003	NA	23.98832919	Horna et al. 2011
Canarium	balsamiferum	natural forest	13.44363104	NA	28.18382931	Horna et al. 2011
Pouteria	firma	natural forest	9.780966325	NA	30.90295433	Horna et al. 2011
Bridelia	glauca	natural forest	10.21903367	NA	32.35936569	Horna et al. 2011
Palaquium	luzoniense	natural forest	33.0579795	NA	34.27677865	Horna et al. 2011
Santiria	apiculata	natural forest	12.26530015	NA	37.15352291	Horna et al. 2011
Palaquium	luzoniense	natural forest	15.63279649	NA	37.15352291	Horna et al. 2011
Platea	excelsa	natural forest	10.06734993	NA	39.81071706	Horna et al. 2011
Cryptocarya	laevigata	natural forest	11.67672035	NA	41.68693835	Horna et al. 2011
Santiria	apiculata	natural forest	20.0204978	NA	44.66835922	Horna et al. 2011
Palaquium	luzoniense	natural forest	13.72327965	NA	47.3151259	Horna et al. 2011
Castanopsis	acuminatissima	natural forest	10.7920937	NA	53.08844442	Horna et al. 2011
Pouteria	firma	natural forest	11.22928258	NA	57.54399373	Horna et al. 2011
Platea	excelsa	natural forest	12.83953148	NA	58.21032178	Horna et al. 2011
Pouteria	firma	natural forest	19.86559297	NA	62.37348355	Horna et al. 2011
Santiria	apiculata	natural forest	27.62459736	NA	64.5654229	Horna et al. 2011
Myrtaceae	sp.	natural forest	14.88609078	NA	66.0693448	Horna et al. 2011
Castanopsis	acuminatissima	natural forest	14.29897511	NA	69.9841996	Horna et al. 2011
Platea	excelsa	natural forest	17.22693997	NA	70.79457844	Horna et al. 2011
Litsea	formanii	natural forest	21.47291362	NA	70.79457844	Horna et al. 2011
Santiria	apiculata	natural forest	23.22869693	NA	74.13102413	Horna et al. 2011
Pouteria	firma	natural forest	27.47291362	NA	79.43282347	Horna et al. 2011
Castanopsis	acuminatissima	natural forest	11.22079063	NA	80.35261222	Horna et al. 2011
Palaquium	luzoniense	natural forest	20.59121523	NA	80.35261222	Horna et al. 2011
Castanopsis	acuminatissima	natural forest	24.54348463	NA	83.17637711	Horna et al. 2011
Santiria	apiculata	natural forest	38.30483163	NA	88.1048873	Horna et al. 2011
Cryptocarya	laevigata	natural forest	19.56281113	NA	92.25714272	Horna et al. 2011
Platea	excelsa	natural forest	18.68081991	NA	105.9253725	Horna et al. 2011
Santiria	apiculata	natural forest	21.315959	NA	107.1519305	Horna et al. 2011
Santiria	apiculata	natural forest	30.24597365	NA	112.2018454	Horna et al. 2011
Castanopsis	acuminatissima	natural forest	17.7988287	NA	121.6186001	Horna et al. 2011
Lithocarpus	celebicus	natural forest	28.63191801	NA	128.8249552	Horna et al. 2011
Castanopsis	acuminatissima	natural forest	31.7033675	NA	146.2177174	Horna et al. 2011
Cryptocarya	laevigata	natural forest	20.56925329	NA	190.5460718	Horna et al. 2011
Litsea	formanii	natural forest	32.86764275	NA	192.7524913	Horna et al. 2011
Litsea	formanii	natural forest	48.09136164	NA	218.7761624	Horna et al. 2011
Myrtaceae	sp.	natural forest	36.23103953	NA	226.4644308	Horna et al. 2011
Litsea	formanii	natural forest	42.67320644	NA	226.4644308	Horna et al. 2011
Myrtaceae	sp.	natural forest	20.27144949	NA	231.739465	Horna et al. 2011
Litsea	formanii	natural forest	42.67232796	NA	234.4228815	Horna et al. 2011
Pouteria	firma	natural forest	27.29721816	NA	251.1886432	Horna et al. 2011
Platea	excelsa	natural forest	25.68316252	NA	288.4031503	Horna et al. 2011
Palaquium	luzoniense	natural forest	38.71390922	NA	288.4031503	Horna et al. 2011
Castanopsis	acuminatissima	natural forest	34.89926794	NA	393.5500755	Horna et al. 2011
Castanopsis	acuminatissima	natural forest	67.10600293	NA	462.3810214	Horna et al. 2011
Pouteria	firma	natural forest	56.84363104	NA	785.2356346	Horna et al. 2011
Pouteria	firma	natural forest	62.9909224	NA	851.1380382	Horna et al. 2011
Castanopsis	acuminatissima	natural forest	71.4	NA	1211.5	Horna et al. 2011
Palaquium	luzoniense	natural forest	67.07759883	NA	1412.537545	Horna et al. 2011
Palaquium	luzoniense	natural forest	95	NA	4384.9	Horna et al. 2011
Micranda	spruceana	natural forest	7.22515199384357	NA	17	Jordan & Kline 1977
Palorojo	NA	natural forest	13.3033941803657	NA	20	Jordan & Kline 1977
Protium	sp	natural forest	13.2073395363607	NA	62	Jordan & Kline 1977
Licania	sp	natural forest	19.7062949623775	NA	69	Jordan & Kline 1977
Micranda	spruceana	natural forest	25.8051212339041	NA	71	Jordan & Kline 1977
Chamanare	NA	natural forest	11.1703838512401	NA	78	Jordan & Kline 1977
Licania	sp	natural forest	12.716187407449	NA	103	Jordan & Kline 1977
Eperua	leucantha	natural forest	15.0121084268041	NA	114	Jordan & Kline 1977
Eperua	leucantha	natural forest	31.1890206992407	NA	131	Jordan & Kline 1977
Ocotea	sp	natural forest	15.5126488374792	NA	131	Jordan & Kline 1977
Eperua	leucantha	natural forest	20.1850601761613	NA	138	Jordan & Kline 1977
Aspidosperma	album	natural forest	16.888032982579	NA	150	Jordan & Kline 1977
Ocotea	sp	natural forest	30.5913560565782	NA	334	Jordan & Kline 1977
Ocotea	sp	natural forest	25.0032121229446	NA	359	Jordan & Kline 1977
Micranda	spruceana	natural forest	47.4858635145869	NA	421	Jordan & Kline 1977
Caradeviejo	NA	natural forest	30.298609072927	NA	426	Jordan & Kline 1977
Aspidosperma	cruentum	natural forest	47.8863698777432	NA	448	Jordan & Kline 1977
Ocotea	sp	natural forest	53.189644371828	NA	547	Jordan & Kline 1977
Ocotea	sp	natural forest	31.9950714011873	NA	628	Jordan & Kline 1977
Eperua	leucantha	natural forest	62.7849474834539	NA	1521	Jordan & Kline 1977
NA	NA	natural forest	8.01106765397977	NA	20.85790496	Medina 2001
NA	NA	natural forest	11.6006529514001	NA	43.33980512	Medina 2001
NA	NA	natural forest	11.1673911514391	NA	40.20068589	Medina 2001
NA	NA	natural forest	14.3196507185852	NA	65.6946889	Medina 2001
NA	NA	natural forest	14.1616208714944	NA	64.27029087	Medina 2001
NA	NA	natural forest	16.3393500896102	NA	85.25521221	Medina 2001
NA	NA	natural forest	17.3128086927014	NA	95.5798298	Medina 2001
NA	NA	natural forest	18.9022622829229	NA	113.6887373	Medina 2001
NA	NA	natural forest	20.5813709766522	NA	134.5012792	Medina 2001
NA	NA	natural forest	22.8904102523423	NA	165.9378346	Medina 2001
NA	NA	natural forest	23.6142054402968	NA	176.4620493	Medina 2001
NA	NA	natural forest	30.1432913699445	NA	285.8050117	Medina 2001
NA	NA	natural forest	31.1602968246008	NA	305.1659378	Medina 2001
NA	NA	natural forest	31.8488521945071	NA	318.6296747	Medina 2001
NA	NA	natural forest	29.4872152260406	NA	273.6477291	Medina 2001
NA	NA	natural forest	27.6327596586202	NA	240.6960498	Medina 2001
NA	NA	natural forest	28.3111694154314	NA	252.5085736	Medina 2001
NA	NA	natural forest	31.536088924147	NA	312.4784526	Medina 2001
NA	NA	natural forest	30.1171220784462	NA	285.3150914	Medina 2001
NA	NA	natural forest	31.9766890383886	NA	321.1609298	Medina 2001
NA	NA	natural forest	47.0346424120218	NA	688.2655005	Medina 2001
NA	NA	natural forest	51.2942517435388	NA	816.8242275	Medina 2001
NA	NA	natural forest	40.3934867906394	NA	509.5353015	Medina 2001
NA	NA	natural forest	41.9836164079152	NA	549.9174393	Medina 2001
NA	NA	natural forest	42.1474097581652	NA	554.1634157	Medina 2001
NA	NA	natural forest	38.3541317457544	NA	459.9716935	Medina 2001
NA	NA	natural forest	38.034191931177	NA	452.4232912	Medina 2001
NA	NA	natural forest	34.4957502571128	NA	373.0561957	Medina 2001
NA	NA	natural forest	40.7787421833541	NA	519.1794742	Medina 2001
NA	NA	natural forest	48.5104993001671	NA	731.5780879	Medina 2001
NA	NA	natural forest	55.846317238295	NA	966.204569	Medina 2001
Cecropia	montana	natural forest	28.3	17	640.4	Kuppers et al. 2008
Ruagea	pubescens	natural forest	38.2	18	1036.7	Kuppers et al. 2008
Anacardiaceae	NA	natural forest	28.9	14	423.1	Kuppers et al. 2008
Trichilia	guianensis	natural forest	40.4	18	1166.3	Kuppers et al. 2008
Guarea	sp.	natural forest	42	18	1228.9	Kuppers et al. 2008
Aniba	muca	natural forest	12.7	12	126.9	Kuppers et al. 2008
Vismia	tomentosa	natural forest	17.5	12	205.1	Kuppers et al. 2008
Tapirira	guianensis	natural forest	31.1	13	423.1	Kuppers et al. 2008
Alzatea	verticillata	natural forest	47.1	13	871.8	Kuppers et al. 2008
Pouteria	sp.	natural forest	17.2	22.5	85	Kuppers et al. 2008
Clarisia	biflora	natural forest	27.4	27	152	Kuppers et al. 2008
Clarisia	biflora	natural forest	36	22.9	192	Kuppers et al. 2008
Clarisia	biflora	natural forest	26.1	29	142	Kuppers et al. 2008
Clarisia	biflora	natural forest	45.8	28.5	261	Kuppers et al. 2008
Piper	obtusifolium	natural forest	11.1	12	96.4	Kuppers et al. 2008
Ocotea	sp.	natural forest	12.7	13	106.2	Kuppers et al. 2008
Aniba	sp.	natural forest	15.9	14	132.7	Kuppers et al. 2008
Graffenrieda	emarginata	natural forest	17.8	11	236.9	Kuppers et al. 2008
Psychotria	brachiata	natural forest	6.1	6	20.7	Kuppers et al. 2008
Persea	caerulea	natural forest	1.3	NA	122.7	Kuppers et al. 2008
UnidentifiedSpecies	NA	natural forest	12.7	17.8	60	Kuppers et al. 2008
Nectandra	sp.	natural forest	17.2	19	77	Kuppers et al. 2008
Pera	officinalis	natural forest	12.4	11.2	60	Kuppers et al. 2008
UnidentifiedSpecies	NA	natural forest	12.7	13.5	62	Kuppers et al. 2008
Tectona	grandis	monoculture plantation	12.42340987	NA	82.6386475598332	Cordero & Kanninen 2003
Tectona	grandis	monoculture plantation	12.29770383	NA	72.3405576039888	Cordero & Kanninen 2003
Tectona	grandis	monoculture plantation	14.30301449	NA	115.849275064557	Cordero & Kanninen 2003
Tectona	grandis	monoculture plantation	13.47510437	NA	93.5799569667381	Cordero & Kanninen 2003
Tectona	grandis	monoculture plantation	13.8268971	NA	98.8248964049342	Cordero & Kanninen 2003
Tectona	grandis	monoculture plantation	14.64882122	NA	113.240965237385	Cordero & Kanninen 2003
Tectona	grandis	monoculture plantation	15.23475872	NA	122.481181204579	Cordero & Kanninen 2003
Tectona	grandis	monoculture plantation	15.82046599	NA	131.693706473875	Cordero & Kanninen 2003
Tectona	grandis	monoculture plantation	14.64536776	NA	108.22321094105	Cordero & Kanninen 2003
Tectona	grandis	monoculture plantation	14.87790091	NA	108.954734282056	Cordero & Kanninen 2003
Tectona	grandis	monoculture plantation	15.70005526	NA	124.371884167276	Cordero & Kanninen 2003
Tectona	grandis	monoculture plantation	16.40364072	NA	136.599306407365	Cordero & Kanninen 2003
Tectona	grandis	monoculture plantation	17.45947937	NA	157.101793924347	Cordero & Kanninen 2003
Tectona	grandis	monoculture plantation	18.6315846	NA	179.438855998616	Cordero & Kanninen 2003
Tectona	grandis	monoculture plantation	17.57459479	NA	154.890970493626	Cordero & Kanninen 2003
Tectona	grandis	monoculture plantation	17.45533522	NA	148.564678973033	Cordero & Kanninen 2003
Tectona	grandis	monoculture plantation	18.51048318	NA	168.125941586083	Cordero & Kanninen 2003
Tectona	grandis	monoculture plantation	18.27518725	NA	161.817474237655	Cordero & Kanninen 2003
Tectona	grandis	monoculture plantation	18.62536837	NA	164.866552804388	Cordero & Kanninen 2003
Tectona	grandis	monoculture plantation	13.81952972	NA	89.2896778239991	Cordero & Kanninen 2003
Tectona	grandis	monoculture plantation	13.81745764	NA	86.6115305186442	Cordero & Kanninen 2003
Tectona	grandis	monoculture plantation	13.10558387	NA	67.8460881779246	Cordero & Kanninen 2003
Tectona	grandis	monoculture plantation	14.3978696	NA	86.3639177158839	Cordero & Kanninen 2003
Tectona	grandis	monoculture plantation	14.97943271	NA	86.9033570228038	Cordero & Kanninen 2003
Tectona	grandis	monoculture plantation	14.86339637	NA	87.26662564434	Cordero & Kanninen 2003
Tectona	grandis	monoculture plantation	14.74689956	NA	86.9107119772873	Cordero & Kanninen 2003
Tectona	grandis	monoculture plantation	14.63546783	NA	93.8649942624092	Cordero & Kanninen 2003
Tectona	grandis	monoculture plantation	15.22140533	NA	101.531298600644	Cordero & Kanninen 2003
Tectona	grandis	monoculture plantation	15.57434921	NA	108.540024041513	Cordero & Kanninen 2003
Tectona	grandis	monoculture plantation	15.22393787	NA	105.498946010582	Cordero & Kanninen 2003
Tectona	grandis	monoculture plantation	15.92936518	NA	119.417747611821	Cordero & Kanninen 2003
Tectona	grandis	monoculture plantation	16.28000675	NA	123.09708134597	Cordero & Kanninen 2003
Tectona	grandis	monoculture plantation	16.86571402	NA	131.674845613584	Cordero & Kanninen 2003
Tectona	grandis	monoculture plantation	17.45096083	NA	139.5620164658	Cordero & Kanninen 2003
Tectona	grandis	monoculture plantation	18.62214514	NA	157.318154774367	Cordero & Kanninen 2003
Tectona	grandis	monoculture plantation	21.43994045	NA	224.842554488901	Cordero & Kanninen 2003
Tectona	grandis	monoculture plantation	17.68303352	NA	138.473776347945	Cordero & Kanninen 2003
Tectona	grandis	monoculture plantation	18.50265533	NA	150.023245579448	Cordero & Kanninen 2003
Tectona	grandis	monoculture plantation	17.91510621	NA	137.179950735392	Cordero & Kanninen 2003
Tectona	grandis	monoculture plantation	18.14879052	NA	139.257321505799	Cordero & Kanninen 2003
Tectona	grandis	monoculture plantation	16.8588071	NA	118.410317628436	Cordero & Kanninen 2003
Tectona	grandis	monoculture plantation	16.85673502	NA	114.435171883927	Cordero & Kanninen 2003
Tectona	grandis	monoculture plantation	18.61431729	NA	139.007960602115	Cordero & Kanninen 2003
Tectona	grandis	monoculture plantation	20.60535363	NA	167.05997962416	Cordero & Kanninen 2003
Tectona	grandis	monoculture plantation	17.19885806	NA	100.413939178298	Cordero & Kanninen 2003
Tectona	grandis	monoculture plantation	18.95690079	NA	122.545973770146	Cordero & Kanninen 2003
Tectona	grandis	monoculture plantation	18.83971329	NA	121.035550880766	Cordero & Kanninen 2003
Tectona	grandis	monoculture plantation	18.72091417	NA	115.728407415322	Cordero & Kanninen 2003
Tectona	grandis	monoculture plantation	21.18369352	NA	153.71931574176	Cordero & Kanninen 2003
Tectona	grandis	monoculture plantation	20.95093013	NA	155.100857333584	Cordero & Kanninen 2003
Tectona	grandis	monoculture plantation	24.0012586	NA	216.885220266275	Cordero & Kanninen 2003
Tectona	grandis	monoculture plantation	23.77033706	NA	225.809673647461	Cordero & Kanninen 2003
Tectona	grandis	monoculture plantation	27.28020629	NA	268.709645896808	Cordero & Kanninen 2003
Tectona	grandis	monoculture plantation	24.34361186	NA	186.540139098812	Cordero & Kanninen 2003
Tectona	grandis	monoculture plantation	29.96976302	NA	289.657649944696	Cordero & Kanninen 2003
Tectona	grandis	monoculture plantation	29.6076099	NA	220.47858016077	Cordero & Kanninen 2003
Tectona	grandis	monoculture plantation	33.47825086	NA	307.834733149976	Cordero & Kanninen 2003
Tectona	grandis	monoculture plantation	30.77142682	NA	187.015385630918	Cordero & Kanninen 2003
Tectona	grandis	monoculture plantation	34.41367878	NA	308.831083342341	Cordero & Kanninen 2003
Tectona	grandis	monoculture plantation	39.68113028	NA	347.437110648513	Cordero & Kanninen 2003
Tectona	grandis	monoculture plantation	49.99363028	NA	551.489800337619	Cordero & Kanninen 2003
Tectona	grandis	monoculture plantation	58.54371316	NA	650.485678113341	Cordero & Kanninen 2003
NA	NA	mixture plantation	10.35714286	NA	77.37166	Kunert et al. 2012
NA	NA	mixture plantation	10.71428571	NA	39.42505	Kunert et al. 2012
NA	NA	monoculture plantation	12.21428571	NA	80.32854	Kunert et al. 2012
NA	NA	mixture plantation	8.5	NA	51.74538	Kunert et al. 2012
NA	NA	monoculture plantation	11.28571429	NA	49.28131	Kunert et al. 2012
NA	NA	monoculture plantation	9.5	NA	69.48665	Kunert et al. 2012
NA	NA	mixture plantation	11.78571429	NA	50.26694	Kunert et al. 2012
NA	NA	mixture plantation	14.71428571	NA	68.00821	Kunert et al. 2012
NA	NA	mixture plantation	10	NA	106.44764	Kunert et al. 2012
NA	NA	mixture plantation	8.285714286	NA	38.93224	Kunert et al. 2012
NA	NA	monoculture plantation	10.28571429	NA	59.63039	Kunert et al. 2012
NA	NA	monoculture plantation	12.07142857	NA	78.8501	Kunert et al. 2012
NA	NA	mixture plantation	9.285714286	NA	49.77413	Kunert et al. 2012
NA	NA	monoculture plantation	11.5	NA	79.83573	Kunert et al. 2012
NA	NA	mixture plantation	12.28571429	NA	55.68789	Kunert et al. 2012
NA	NA	mixture plantation	14.57142857	NA	104.47639	Kunert et al. 2012
NA	NA	mixture plantation	11.71428571	NA	66.03696	Kunert et al. 2012
NA	NA	monoculture plantation	9.928571429	NA	63.5729	Kunert et al. 2012
NA	NA	monoculture plantation	10.35714286	NA	60.1232	Kunert et al. 2012
NA	NA	mixture plantation	13.92857143	NA	98.06982	Kunert et al. 2012
NA	NA	mixture plantation	12.5	NA	83.28542	Kunert et al. 2012
NA	NA	mixture plantation	11.28571429	NA	70.47228	Kunert et al. 2012
NA	NA	mixture plantation	18	NA	149.32238	Kunert et al. 2012
NA	NA	monoculture plantation	11.42857143	NA	71.45791	Kunert et al. 2012
NA	NA	mixture plantation	10.64285714	NA	63.5729	Kunert et al. 2012
NA	NA	monoculture plantation	14.07142857	NA	111.86858	Kunert et al. 2012
NA	NA	monoculture plantation	9.857142857	NA	54.70226	Kunert et al. 2012
NA	NA	mixture plantation	14.14285714	NA	126.16016	Kunert et al. 2012
NA	NA	mixture plantation	12.92857143	NA	52.23819	Kunert et al. 2012
NA	NA	mixture plantation	16.14285714	NA	92.64887	Kunert et al. 2012
NA	NA	mixture plantation	13.35714286	NA	121.72485	Kunert et al. 2012
NA	NA	monoculture plantation	10.85714286	NA	79.83573	Kunert et al. 2012
NA	NA	mixture plantation	11.5	NA	72.44353	Kunert et al. 2012
NA	NA	monoculture plantation	12.57142857	NA	84.27105	Kunert et al. 2012
NA	NA	mixture plantation	11	NA	74.41478	Kunert et al. 2012
NA	NA	monoculture plantation	11.5	NA	70.47228	Kunert et al. 2012
NA	NA	mixture plantation	9.642857143	NA	154.25051	Kunert et al. 2012
NA	NA	mixture plantation	14.85714286	NA	57.65914	Kunert et al. 2012
NA	NA	mixture plantation	19	NA	106.44764	Kunert et al. 2012
NA	NA	monoculture plantation	15.92857143	NA	83.28542	Kunert et al. 2012
NA	NA	monoculture plantation	11.92857143	NA	76.38604	Kunert et al. 2012
NA	NA	monoculture plantation	17.35714286	NA	95.11294	Kunert et al. 2012
NA	NA	mixture plantation	23.21428571	NA	140.45175	Kunert et al. 2012
NA	NA	mixture plantation	15	NA	138.97331	Kunert et al. 2012
NA	NA	mixture plantation	13.28571429	NA	99.05544	Kunert et al. 2012
NA	NA	monoculture plantation	12.85714286	NA	65.54415	Kunert et al. 2012
NA	NA	mixture plantation	16.64285714	NA	125.17454	Kunert et al. 2012
NA	NA	mixture plantation	18	NA	99.54825	Kunert et al. 2012
NA	NA	mixture plantation	19.5	NA	157.20739	Kunert et al. 2012
NA	NA	mixture plantation	17.21428571	NA	170.02053	Kunert et al. 2012
NA	NA	monoculture plantation	20.5	NA	119.26078	Kunert et al. 2012
NA	NA	mixture plantation	21.14285714	NA	174.94867	Kunert et al. 2012
NA	NA	mixture plantation	15.28571429	NA	178.39836	Kunert et al. 2012
NA	NA	mixture plantation	21.5	NA	111.86858	Kunert et al. 2012
NA	NA	mixture plantation	14.71428571	NA	134.53799	Kunert et al. 2012
NA	NA	mixture plantation	21	NA	172.97741	Kunert et al. 2012
NA	NA	mixture plantation	24.78571429	NA	153.26489	Kunert et al. 2012
Minquartia	guianensis	natural forest	16.98869741	NA	111.839186137563	Ryan et al. 1994
Minquartia	guianensis	natural forest	27.70424169	NA	176.259134923987	Ryan et al. 1994
Minquartia	guianensis	natural forest	36.28303752	NA	225.396421112972	Ryan et al. 1994
Minquartia	guianensis	natural forest	41.61072672	NA	190.47520371758	Ryan et al. 1994
Minquartia	guianensis	natural forest	46.40379905	NA	239.494152517249	Ryan et al. 1994
Simarouba	amara	natural forest	20.41559444	NA	31.0144821477351	Ryan et al. 1994
Simarouba	amara	natural forest	14.83144622	NA	58.9867855737036	Ryan et al. 1994
Simarouba	amara	natural forest	29.36438497	NA	171.69453263261	Ryan et al. 1994
Simarouba	amara	natural forest	28.63098302	NA	205.079413810924	Ryan et al. 1994
Simarouba	amara	natural forest	36.67009779	NA	186.544495904057	Ryan et al. 1994
Simarouba	amara	natural forest	47.08440556	NA	308.097456015751	Ryan et al. 1994
Simarouba	amara	natural forest	43.05584148	NA	376.599772293512	Ryan et al. 1994
Albizia	multiflora	natural forest	16.07142857	NA	54.54545455	Parolin et al. 2008
Albizia	multiflora	natural forest	18.18181818	NA	62.33766234	Parolin et al. 2008
Albizia	multiflora	natural forest	23.7012987	NA	80.51948052	Parolin et al. 2008
Albizia	multiflora	natural forest	19.15584416	NA	93.50649351	Parolin et al. 2008
Albizia	multiflora	natural forest	10.87662338	NA	89.61038961	Parolin et al. 2008
Albizia	multiflora	natural forest	13.96103896	NA	119.4805195	Parolin et al. 2008
Albizia	multiflora	natural forest	16.72077922	NA	116.8831169	Parolin et al. 2008
Albizia	multiflora	natural forest	18.34415584	NA	106.4935065	Parolin et al. 2008
Albizia	multiflora	natural forest	18.01948052	NA	124.6753247	Parolin et al. 2008
Albizia	multiflora	natural forest	17.69480519	NA	150.6493506	Parolin et al. 2008
Albizia	multiflora	natural forest	34.25324675	NA	192.2077922	Parolin et al. 2008
Albizia	multiflora	natural forest	34.9025974	NA	218.1818182	Parolin et al. 2008
Albizia	multiflora	natural forest	33.27922078	NA	272.7272727	Parolin et al. 2008
Crateva	benthamii	natural forest	8.543845535	NA	36.36363636	Parolin et al. 2008
Crateva	benthamii	natural forest	8.981726238	NA	51.94805195	Parolin et al. 2008
Crateva	benthamii	natural forest	11.62931464	NA	76.62337662	Parolin et al. 2008
Crateva	benthamii	natural forest	12.06719534	NA	92.20779221	Parolin et al. 2008
Crateva	benthamii	natural forest	13.25633069	NA	61.03896104	Parolin et al. 2008
Crateva	benthamii	natural forest	16.20158602	NA	76.62337662	Parolin et al. 2008
Crateva	benthamii	natural forest	10.74857296	NA	62.33766234	Parolin et al. 2008
Crateva	benthamii	natural forest	15.31739647	NA	74.02597403	Parolin et al. 2008
Crateva	benthamii	natural forest	20.90334444	NA	137.6623377	Parolin et al. 2008
Crateva	benthamii	natural forest	21.78485232	NA	149.3506494	Parolin et al. 2008
Laetia	corymbulosa	natural forest	12.95081967	NA	42.85714286	Parolin et al. 2008
Laetia	corymbulosa	natural forest	15.24590164	NA	50.64935065	Parolin et al. 2008
Laetia	corymbulosa	natural forest	11.63934426	NA	62.33766234	Parolin et al. 2008
Laetia	corymbulosa	natural forest	10	NA	84.41558442	Parolin et al. 2008
Laetia	corymbulosa	natural forest	10.32786885	NA	77.92207792	Parolin et al. 2008
Laetia	corymbulosa	natural forest	14.91803279	NA	74.02597403	Parolin et al. 2008
Laetia	corymbulosa	natural forest	18.85245902	NA	75.32467532	Parolin et al. 2008
Laetia	corymbulosa	natural forest	18.68852459	NA	90.90909091	Parolin et al. 2008
Laetia	corymbulosa	natural forest	13.60655738	NA	97.4025974	Parolin et al. 2008
Laetia	corymbulosa	natural forest	15.73770492	NA	116.8831169	Parolin et al. 2008
Laetia	corymbulosa	natural forest	24.09836066	NA	97.4025974	Parolin et al. 2008
Laetia	corymbulosa	natural forest	23.60655738	NA	150.6493506	Parolin et al. 2008
Laetia	corymbulosa	natural forest	17.04918033	NA	148.0519481	Parolin et al. 2008
Nectandra	amazonum	natural forest	8.442211055	NA	43.66213088	Parolin et al. 2008
Nectandra	amazonum	natural forest	10.10050251	NA	45.87826774	Parolin et al. 2008
Nectandra	amazonum	natural forest	12.66331658	NA	54.81903902	Parolin et al. 2008
Nectandra	amazonum	natural forest	16.28140704	NA	50.25690249	Parolin et al. 2008
Nectandra	amazonum	natural forest	18.3919598	NA	63.7005251	Parolin et al. 2008
Nectandra	amazonum	natural forest	17.93969849	NA	89.55169104	Parolin et al. 2008
Nectandra	amazonum	natural forest	16.4321608	NA	103.0630681	Parolin et al. 2008
Nectandra	amazonum	natural forest	13.11557789	NA	107.6195585	Parolin et al. 2008
Nectandra	amazonum	natural forest	13.71859296	NA	81.76556942	Parolin et al. 2008
Nectandra	amazonum	natural forest	22.91457286	NA	107.4360567	Parolin et al. 2008
Nectandra	amazonum	natural forest	17.33668342	NA	142.3719722	Parolin et al. 2008
Nectandra	amazonum	natural forest	26.53266332	NA	159.0536954	Parolin et al. 2008
Nectandra	amazonum	natural forest	28.79396985	NA	144.4046073	Parolin et al. 2008
Nectandra	amazonum	natural forest	32.71356784	NA	189.2750268	Parolin et al. 2008
Nectandra	amazonum	natural forest	46.13065327	NA	236.2147818	Parolin et al. 2008
Pseudobombax	munguba	natural forest	9.513581592	NA	25.9009009	Parolin et al. 2008
Pseudobombax	munguba	natural forest	12.38409694	NA	29.27927928	Parolin et al. 2008
Pseudobombax	munguba	natural forest	20.68622779	NA	63.06306306	Parolin et al. 2008
Pseudobombax	munguba	natural forest	21.13690517	NA	72.07207207	Parolin et al. 2008
Pseudobombax	munguba	natural forest	8.144870311	NA	54.05405405	Parolin et al. 2008
Pseudobombax	munguba	natural forest	10.26107972	NA	52.92792793	Parolin et al. 2008
Pseudobombax	munguba	natural forest	11.76560692	NA	75.45045045	Parolin et al. 2008
Pseudobombax	munguba	natural forest	12.97297297	NA	81.08108108	Parolin et al. 2008
Pseudobombax	munguba	natural forest	13.72251345	NA	101.3513514	Parolin et al. 2008
Pseudobombax	munguba	natural forest	14.47341548	NA	117.1171171	Parolin et al. 2008
Pseudobombax	munguba	natural forest	16.28565593	NA	121.6216216	Parolin et al. 2008
Pseudobombax	munguba	natural forest	13.25822044	NA	137.3873874	Parolin et al. 2008
Pseudobombax	munguba	natural forest	17.18054326	NA	161.036036	Parolin et al. 2008
Pseudobombax	munguba	natural forest	20.66206004	NA	143.018018	Parolin et al. 2008
Pseudobombax	munguba	natural forest	19.28620056	NA	194.8198198	Parolin et al. 2008
Pseudobombax	munguba	natural forest	21.25161686	NA	192.5675676	Parolin et al. 2008
Pseudobombax	munguba	natural forest	26.38505004	NA	209.4594595	Parolin et al. 2008
Pseudobombax	munguba	natural forest	26.06031724	NA	283.7837838	Parolin et al. 2008
Pseudobombax	munguba	natural forest	31.64647015	NA	302.9279279	Parolin et al. 2008
Pseudobombax	munguba	natural forest	40.12015794	NA	269.1441441	Parolin et al. 2008
Pseudobombax	munguba	natural forest	38.90053782	NA	304.0540541	Parolin et al. 2008
Pseudobombax	munguba	natural forest	37.22139016	NA	359.2342342	Parolin et al. 2008
Pseudobombax	munguba	natural forest	41.11852407	NA	466.2162162	Parolin et al. 2008
Tabebuia	barbata	natural forest	7.938760448	NA	15.15987927	Parolin et al. 2008
Tabebuia	barbata	natural forest	10.66801875	NA	34.80801887	Parolin et al. 2008
Tabebuia	barbata	natural forest	11.7051789	NA	52.11302256	Parolin et al. 2008
Tabebuia	barbata	natural forest	10.26839557	NA	69.36102294	Parolin et al. 2008
Tabebuia	barbata	natural forest	14.57034508	NA	49.87489274	Parolin et al. 2008
Tabebuia	barbata	natural forest	13.38647642	NA	95.93056397	Parolin et al. 2008
Tabebuia	barbata	natural forest	20.29467709	NA	68.43996952	Parolin et al. 2008
Tabebuia	barbata	natural forest	20.54639169	NA	101.8559076	Parolin et al. 2008
Tabebuia	barbata	natural forest	18.58247778	NA	143.2853105	Parolin et al. 2008
Tabebuia	barbata	natural forest	21.95587344	NA	189.4459879	Parolin et al. 2008
Tabebuia	barbata	natural forest	26.64844561	NA	169.9688582	Parolin et al. 2008
Tabebuia	barbata	natural forest	28.07652844	NA	186.1307956	Parolin et al. 2008
Vitex	cymosa	natural forest	6.942409632	NA	20.73732719	Parolin et al. 2008
Vitex	cymosa	natural forest	14.32001012	NA	47.23502304	Parolin et al. 2008
Vitex	cymosa	natural forest	13.1689353	NA	64.51612903	Parolin et al. 2008
Vitex	cymosa	natural forest	9.700394236	NA	63.3640553	Parolin et al. 2008
Vitex	cymosa	natural forest	11.4408247	NA	85.25345622	Parolin et al. 2008
Vitex	cymosa	natural forest	14.04697531	NA	102.5345622	Parolin et al. 2008
Vitex	cymosa	natural forest	17.36634613	NA	87.55760369	Parolin et al. 2008
Vitex	cymosa	natural forest	18.9559415	NA	87.55760369	Parolin et al. 2008
Vitex	cymosa	natural forest	18.23839269	NA	104.8387097	Parolin et al. 2008
Vitex	cymosa	natural forest	17.08831677	NA	125.5760369	Parolin et al. 2008
Vitex	cymosa	natural forest	17.52450654	NA	134.7926267	Parolin et al. 2008
Vitex	cymosa	natural forest	19.40578301	NA	144.0092166	Parolin et al. 2008
Vitex	cymosa	natural forest	24.76192696	NA	176.2672811	Parolin et al. 2008
Bombacopsis	quinata	natural forest	14.23941809	NA	134.82779775427	Perez & Kanninen 2004
Bombacopsis	quinata	natural forest	18.10248008	NA	215.127540469273	Perez & Kanninen 2004
Bombacopsis	quinata	natural forest	20.04443782	NA	226.274041833861	Perez & Kanninen 2004
Bombacopsis	quinata	natural forest	20.31374593	NA	255.494636377195	Perez & Kanninen 2004
Bombacopsis	quinata	natural forest	21.50398451	NA	306.70688487741	Perez & Kanninen 2004
Bombacopsis	quinata	natural forest	22.23683623	NA	339.711234023312	Perez & Kanninen 2004
Bombacopsis	quinata	natural forest	23.53452	NA	331.660908132645	Perez & Kanninen 2004
Bombacopsis	quinata	natural forest	26.01986048	NA	390.479046903898	Perez & Kanninen 2004
Bombacopsis	quinata	natural forest	24.91303592	NA	375.863725978784	Perez & Kanninen 2004
Bombacopsis	quinata	natural forest	25.83118592	NA	412.001658823308	Perez & Kanninen 2004
Bombacopsis	quinata	natural forest	25.27946178	NA	394.589859823241	Perez & Kanninen 2004
Bombacopsis	quinata	natural forest	24.44949232	NA	381.27332902625	Perez & Kanninen 2004
Bombacopsis	quinata	natural forest	25.46078796	NA	414.56622878371	Perez & Kanninen 2004
Bombacopsis	quinata	natural forest	30.71249472	NA	520.022866232184	Perez & Kanninen 2004
Bombacopsis	quinata	natural forest	29.60070505	NA	545.480293314317	Perez & Kanninen 2004
Bombacopsis	quinata	natural forest	28.77153	NA	526.582076113395	Perez & Kanninen 2004
Bombacopsis	quinata	natural forest	29.31868623	NA	580.337953255876	Perez & Kanninen 2004
Bombacopsis	quinata	natural forest	30.60504953	NA	640.324486307682	Perez & Kanninen 2004
Bombacopsis	quinata	natural forest	31.5305479	NA	629.043613166509	Perez & Kanninen 2004
Bombacopsis	quinata	natural forest	32.81154887	NA	739.634869205845	Perez & Kanninen 2004
Bombacopsis	quinata	natural forest	33.64231275	NA	746.84448660768	Perez & Kanninen 2004
Bombacopsis	quinata	natural forest	35.94195775	NA	843.670916964877	Perez & Kanninen 2004
Bombacopsis	quinata	natural forest	37.78858519	NA	840.542407084822	Perez & Kanninen 2004
Bombacopsis	quinata	natural forest	45.871602	NA	1399.20958807459	Perez & Kanninen 2004
Bombacopsis	quinata	natural forest	49.64946253	NA	1476.08952550969	Perez & Kanninen 2004
Eperua	falcata	natural forest	45.2000038380983	35	535	Granier et al. 1996
Eperua	falcata	natural forest	13.3690152197192	18	103	Granier et al. 1996
Eperua	falcata	natural forest	39.1521160006063	39	452	Granier et al. 1996
Vouacapoua	americana	natural forest	49.0197224723038	28	288	Granier et al. 1996
Vouacapoua	americana	natural forest	20.6901426019464	16	112	Granier et al. 1996
Dicorynia	guianensis	natural forest	57.2957795130823	44	707	Granier et al. 1996
Dicorynia	guianensis	natural forest	54.1126806512444	39	666	Granier et al. 1996
Carapa	procera	natural forest	37.5605665696873	37	355	Granier et al. 1996
Eperua	falcata	natural forest	58.2507091716337	31	658	Granier et al. 1996
Eperua	falcata	natural forest	26.7380304394384	25	360	Granier et al. 1996
Eperua	falcata	natural forest	24.1915513499681	27	339	Granier et al. 1996
Eperua	falcata	natural forest	55.3859201959796	33	796	Granier et al. 1996
Cassipourea	guianensis	natural forest	17.1887338539247	18	186	Granier et al. 1996
Lecythis	idatimon	natural forest	39.1521160006063	34	515	Granier et al. 1996
Hirtella	glandulosa	natural forest	31.8309886183791	31	395	Granier et al. 1996
Caryocar	glabrum	natural forest	26.4197205532546	27	282	Granier et al. 1996
Micrandra	sprucei	natural forest	5.54772934342449	NA	10.09388115	Klinge & Herrera 1983
Micrandra	sprucei	natural forest	5.38852120174781	NA	9.529692798	Klinge & Herrera 1983
Micrandra	sprucei	natural forest	6.55087768370311	NA	14.01668704	Klinge & Herrera 1983
Micrandra	sprucei	natural forest	7.42451692327811	NA	17.94903746	Klinge & Herrera 1983
Micrandra	sprucei	natural forest	7.42385066728764	NA	17.94585595	Klinge & Herrera 1983
Micrandra	sprucei	natural forest	7.88055411417362	NA	20.19200433	Klinge & Herrera 1983
Micrandra	sprucei	natural forest	7.65401586587312	NA	19.06150661	Klinge & Herrera 1983
Micrandra	sprucei	natural forest	8.41598903992259	NA	22.99173602	Klinge & Herrera 1983
Micrandra	sprucei	natural forest	8.72223750838711	NA	24.67369604	Klinge & Herrera 1983
Micrandra	sprucei	natural forest	8.72166812786368	NA	24.67051453	Klinge & Herrera 1983
Micrandra	sprucei	natural forest	9.0196259416174	NA	26.3630796	Klinge & Herrera 1983
Micrandra	sprucei	natural forest	9.30667551440384	NA	28.04610013	Klinge & Herrera 1983
Micrandra	sprucei	natural forest	9.76578446148059	NA	30.84477132	Klinge & Herrera 1983
Micrandra	sprucei	natural forest	9.58360730683919	NA	29.71851561	Klinge & Herrera 1983
Micrandra	sprucei	natural forest	10.0316744755009	NA	32.52567084	Klinge & Herrera 1983
Micrandra	sprucei	natural forest	10.4602256780741	NA	35.32752354	Klinge & Herrera 1983
Micrandra	sprucei	natural forest	10.7105368141868	NA	37.01690709	Klinge & Herrera 1983
Micrandra	sprucei	natural forest	11.6558280164606	NA	43.7479287	Klinge & Herrera 1983
Micrandra	sprucei	natural forest	11.8021216667886	NA	44.83918776	Klinge & Herrera 1983
Micrandra	sprucei	natural forest	12.2457636149614	NA	48.22962042	Klinge & Herrera 1983
Micrandra	sprucei	natural forest	12.3188886003225	NA	48.8001718	Klinge & Herrera 1983
Micrandra	sprucei	natural forest	13.3511867966517	NA	57.20785091	Klinge & Herrera 1983
Micrandra	sprucei	natural forest	13.7428985181333	NA	60.57071046	Klinge & Herrera 1983
Micrandra	sprucei	natural forest	13.678923812764	NA	60.01500614	Klinge & Herrera 1983
Micrandra	sprucei	natural forest	14.1247230027405	NA	63.93993303	Klinge & Herrera 1983
Micrandra	sprucei	natural forest	14.3106789156896	NA	65.61340902	Klinge & Herrera 1983
Micrandra	sprucei	natural forest	14.4872511578814	NA	67.22219424	Klinge & Herrera 1983
Micrandra	sprucei	natural forest	14.7349899735173	NA	69.5118233	Klinge & Herrera 1983
Micrandra	sprucei	natural forest	14.8566143592023	NA	70.64974455	Klinge & Herrera 1983
Micrandra	sprucei	natural forest	15.2106119902593	NA	74.0136646	Klinge & Herrera 1983
Micrandra	sprucei	natural forest	15.9515631163352	NA	81.30463255	Klinge & Herrera 1983
Micrandra	sprucei	natural forest	15.7277804696493	NA	79.0669682	Klinge & Herrera 1983
Micrandra	sprucei	natural forest	16.1736758913781	NA	83.55608345	Klinge & Herrera 1983
Micrandra	sprucei	natural forest	16.1211122811331	NA	83.02052871	Klinge & Herrera 1983
Micrandra	sprucei	natural forest	18.9656681132358	NA	114.4432749	Klinge & Herrera 1983
Micrandra	sprucei	natural forest	17.0836982703599	NA	93.0974418	Klinge & Herrera 1983
Micrandra	sprucei	natural forest	17.2389651659226	NA	94.77622031	Klinge & Herrera 1983
Micrandra	sprucei	natural forest	17.342273223064	NA	95.90141551	Klinge & Herrera 1983
Micrandra	sprucei	natural forest	17.7482157022602	NA	100.3862887	Klinge & Herrera 1983
Micrandra	sprucei	natural forest	17.4940500504918	NA	97.56640746	Klinge & Herrera 1983
Micrandra	sprucei	natural forest	18.1444618452686	NA	104.8616174	Klinge & Herrera 1983
Micrandra	sprucei	natural forest	18.2433203266288	NA	105.9931757	Klinge & Herrera 1983
Micrandra	sprucei	natural forest	18.3850883832168	NA	107.6263525	Klinge & Herrera 1983
Micrandra	sprucei	natural forest	18.6097258961101	NA	110.2394354	Klinge & Herrera 1983
Micrandra	sprucei	natural forest	19.3803923204324	NA	119.4393113	Klinge & Herrera 1983
Micrandra	sprucei	natural forest	19.9691036020198	NA	126.7122507	Klinge & Herrera 1983
Micrandra	sprucei	natural forest	20.6277654524105	NA	135.1008407	Klinge & Herrera 1983
Micrandra	sprucei	natural forest	21.2245509074939	NA	142.9305449	Klinge & Herrera 1983
Micrandra	sprucei	natural forest	21.6042320930944	NA	148.0252082	Klinge & Herrera 1983
Micrandra	sprucei	natural forest	22.260621493859	NA	157.0405563	Klinge & Herrera 1983
Micrandra	sprucei	natural forest	22.3778987868608	NA	158.6790357	Klinge & Herrera 1983
Micrandra	sprucei	natural forest	22.851447180167	NA	165.3803632	Klinge & Herrera 1983
Micrandra	sprucei	natural forest	24.0027546477136	NA	182.2434441	Klinge & Herrera 1983
Micrandra	sprucei	natural forest	25.349177164084	NA	202.9890317	Klinge & Herrera 1983
Micrandra	sprucei	natural forest	25.6643219435777	NA	208.0041572	Klinge & Herrera 1983
Micrandra	sprucei	natural forest	27.4329273223712	NA	237.2698374	Klinge & Herrera 1983
Micrandra	sprucei	natural forest	27.7828301338073	NA	243.2850185	Klinge & Herrera 1983
Micrandra	sprucei	natural forest	29.640743249598	NA	276.4692626	Klinge & Herrera 1983
Micrandra	sprucei	natural forest	31.6447178201825	NA	314.6081834	Klinge & Herrera 1983
Micrandra	sprucei	natural forest	32.5995126978444	NA	333.6346933	Klinge & Herrera 1983
Micrandra	sprucei	natural forest	33.9539363642601	NA	361.570501	Klinge & Herrera 1983
Sweetia	fruticosa	natural forest	37.444226668868	22.98800959	287.91406	van der Sande et al. 2015
Sweetia	fruticosa	natural forest	48.7145270109793	23.12230216	328.66471	van der Sande et al. 2015
Cariniana	ianeirensis	natural forest	NA	22.38369305	459.61573	van der Sande et al. 2015
Sweetia	fruticosa	natural forest	45.6131520493731	24.63309353	459.61573	van der Sande et al. 2015
Sweetia	fruticosa	natural forest	50.7269846805804	24.63309353	459.61573	van der Sande et al. 2015
Sweetia	fruticosa	natural forest	48.7145270109793	22.85371703	476.13006	van der Sande et al. 2015
Sweetia	fruticosa	natural forest	42.0657822410694	21.61151079	515.48938	van der Sande et al. 2015
Sweetia	fruticosa	natural forest	54.4508951380784	26.61390887	543.52033	van der Sande et al. 2015
Cariniana	ianeirensis	natural forest	NA	26.61390887	543.52033	van der Sande et al. 2015
Sweetia	fruticosa	natural forest	47.4974879503577	23.62589928	648.43938	van der Sande et al. 2015
Schizolobium	parahyba	natural forest	34.8834066013643	26.58033573	677.69266	van der Sande et al. 2015
Cariniana	ianeirensis	natural forest	NA	22.38369305	695.87434	van der Sande et al. 2015
Cariniana	ianeirensis	natural forest	NA	24.59952038	702.04265	van der Sande et al. 2015
Cariniana	ianeirensis	natural forest	NA	24.19664269	914.83734	van der Sande et al. 2015
Schizolobium	parahyba	natural forest	44.9259608903364	21.57793765	956.10872	van der Sande et al. 2015
Schizolobium	parahyba	natural forest	52.2907012093897	28.39328537	1017.03532	van der Sande et al. 2015
Schizolobium	parahyba	natural forest	63.6985702015437	29.19904077	1290.6794	van der Sande et al. 2015
Schizolobium	parahyba	natural forest	45.15386654105	25.00239808	1325.30677	van der Sande et al. 2015
Cariniana	ianeirensis	natural forest	NA	28.39328537	1434.86331	van der Sande et al. 2015
Schizolobium	parahyba	natural forest	55.2837802851789	22.7529976	1460.41367	van der Sande et al. 2015
Hura	crepitans	natural forest	54.727119904869	26.61390887	1567.24656	van der Sande et al. 2015
Hura	crepitans	natural forest	61.1714994577698	23.99520384	1609.29389	van der Sande et al. 2015
Schizolobium	parahyba	natural forest	48.7145270109793	26.78177458	1609.29389	van der Sande et al. 2015
Schizolobium	parahyba	natural forest	58.448180960835	29.09832134	1696.80306	van der Sande et al. 2015
Hura	crepitans	natural forest	69.4206009646133	24.80095923	1853.35338	van der Sande et al. 2015
Schizolobium	parahyba	natural forest	72.6551654370885	26.00959233	1954.13386	van der Sande et al. 2015
Cariniana	ianeirensis	natural forest	NA	29.03117506	1988.93078	van der Sande et al. 2015
Schizolobium	parahyba	natural forest	59.3422088907835	28.39328537	2042.29139	van der Sande et al. 2015
Hura	crepitans	natural forest	80.8007625575045	25.97601918	2097.08361	van der Sande et al. 2015
Hura	crepitans	natural forest	81.2106580053012	22.08153477	2153.34583	van der Sande et al. 2015
Hura	crepitans	natural forest	67.3446268411703	25.60671463	2172.43336	van der Sande et al. 2015
Cariniana	ianeirensis	natural forest	NA	32.38848921	2172.43336	van der Sande et al. 2015
Schizolobium	parahyba	natural forest	70.840015532594	29.09832134	2191.69008	van der Sande et al. 2015
Hura	crepitans	natural forest	80.8007625575045	25.00239808	2393.89962	van der Sande et al. 2015
Hura	crepitans	natural forest	84.9945651864026	29.19904077	2569.01933	van der Sande et al. 2015
Hura	crepitans	natural forest	61.4818172783474	27.41966427	2732.72624	van der Sande et al. 2015
Cariniana	ianeirensis	natural forest	NA	31.61630695	2856.00869	van der Sande et al. 2015
Hura	crepitans	natural forest	103.537190083754	31.98561151	2932.63196	van der Sande et al. 2015
Hura	crepitans	natural forest	72.6551654370885	23.39088729	3092.10077	van der Sande et al. 2015
Hura	crepitans	natural forest	75.2747780890581	32.32134293	3175.0581	van der Sande et al. 2015
Hura	crepitans	natural forest	73.3941821645433	29.40047962	3529.74905	van der Sande et al. 2015
Hura	crepitans	natural forest	78.7821105555719	29.19904077	4723.04682	van der Sande et al. 2015
Hura	crepitans	natural forest	101.977336676957	25.60671463	5785.93935	van der Sande et al. 2015
