# Supplementary material for: Linking hydraulic traits to tropical forest function in a size-structured and trait-driven model (TFS v.1-Hydro)
Source: Copernicus journal article supplement (doi:10.5194/gmd-9-4227-2016), 2016-11-24
Supplement: Supplementary file 1 [file gmd-9-4227-2016-supplement.zip › SA_headers.csv]

column	units	description
genus		genus (uncleaned)
species		species (uncleaned)
Forest Type		natural forest or plantation
DBH	cm	diameter at breast height
H	m	tree height
SA	cm2	sapwood area
Reference		Reference
