# Supplementary material for: Linking hydraulic traits to tropical forest function in a size-structured and trait-driven model (TFS v.1-Hydro)
Source: Copernicus journal article supplement (doi:10.5194/gmd-9-4227-2016), 2016-11-24
Supplement: Supplementary file 1 [file gmd-9-4227-2016-supplement.zip › SA_references.xlsx]

## Sheet: SA_references
Reference	Full Citation	DOI
Apgaua et al. 2015	Apgaua, D. M., Ishida, F. Y., Tng, D. Y., Laidlaw, M. J., Santos, R. M., Rumman, R., Eamus, D., Holtum, J. A., and Laurance, S. G.: Functional Traits and Water Transport Strategies in Lowland Tropical Rainforest Trees, PLoS One, 10, e0130799, 2015.	10.1093/treephys/25.4.457
Calvo-Alvarado et al. 2008	Calvo-Alvarado, J. C., McDowell, N. G., and Waring, R. H.: Allometric relationships predicting foliar biomass and leaf area:sapwood area ratio from tree height in five Costa Rican rain forest species, Tree Physiology, 28, 1601-1608, 2008.	10.1093/treephys/28.11.1601
Meinzer et al. 2001	Meinzer, F. C., Goldstein, G., and Andrade, J. L.: Regulation of water flux through tropical forest canopy trees: Do universal rules apply?, Tree Physiology, 21, 19-26, 2001.	10.1093/treephys/21.1.19
Andrade et al. 1998	Andrade, J. L., Meinzer, F. C., Goldstein, G., Holbrook, N. M., Cavelier, J., Jackson, P., and Silveira, K.: Regulation of water flux through trunks, branches, and leaves in trees of a lowland tropical forest, Oecologia, 115, 463-471, 1998.	10.1007/s004420050542
Horna et al. 2011	Horna, V., Schuldt, B., Brix, S., and Leuschner, C.: Environment and tree size controlling stem sap flux in a perhumid tropical forest of Central Sulawesi, Indonesia, Annals of Forest Science, 68, 1027-1038, 2011.	10.1007/s13595-011-0110-2
Jordan & Kline 1977	Jordan, C. F. and Kline, J. R.: Transpiration of trees in a tropical rainforest, Journal of Applied Ecology, 14, 853-860, 1977.	10.2307/2402816
Medina 2001	Medina, E.: Physiological ecology of trees and applications to forest management. In: Tropical Forests: Management and Ecology, Lugo, A. E. and Lowe, C. (Eds.), Ecological Studies, 112, Springer-Verlag, New York, 2001.	10.1007/978-1-4612-2498-3
Kuppers et al. 2008	Küppers, M., Motzer, T., Schmitt, D., Ohlemacher, C., R. Zimmermann, Horna, V., Küppers, B. I. L., and Mette, T.: Stand Structure , Transpiration Responses in Trees and Vines and Stand Transpiration of Different Forest Types Within the Mountain Rainforest. In: Gradients in a Tropical Mountain Ecosystem of Ecuador, Beck, E., Bendix, J., Kottke, I., Makeschin, F., and Mosandl, R. (Eds.), Ecological…	10.1007/978-3-540-73526-7
Cordero & Kanninen 2003	Pérez Cordero, L. D. and Kanninen, M.: Heartwood, Sapwood and Bark Content, and Wood Dry Density of Young and Mature Teak (Tectona grandis) Trees Grown in Costa Rica, Silva Fennica, 37, 45-54, 2003.	10.14214/sf.511
Kunert et al. 2012	Kunert, N., Schwendenmann, L., Potvin, C., and Hölscher, D.: Tree diversity enhances tree transpiration in a Panamanian forest plantation, Journal of Applied Ecology, 49, 135-144, 2012.	10.1111/j.1365-2664.2011.02065.x
Ryan et al. 1994	Ryan, M. G., Hubbard, R. M., Clark, D. A., and Sanford, J., R. L.: Woody-tissue respiration for Simarouba amara and Minquartia guianensis, two tropical wet forest trees with different growth habits, Oecologia, 100, 213-220, 1994.	10.1007/BF00316947
Parolin et al. 2008	Parolin, P., Müller, E., and Junk, W. J.: Sapwood area in seven common tree species of central Amazon floodplains, Pesquisas Botânica, 59, 277-286, 2008.	http://hdl.handle.net/11858/00-001M-0000-000F-D718-1
Perez & Kanninen 2004	Pérez, D., Kanninen, M., Matamoros, F., Fonseca, W., and Chaves, E.: Heartwood, sapwood and bark contents of Bombacopsis quinata in Costa Rica, Journal of Tropical Forest Science, 16, 318-327, 2004.	http://www.jstor.org/stable/23616609
Granier et al. 1996	Granier, A., Huc, R., and Barigah, S. T.: Transpiration of natural rain forest and its dependence on climatic factors, Agricultural and Forest Meteorology, 78, 19-29, 1996	10.1016/0168-1923(95)02252-X
Klinge & Herrera 1983	Klinge, H. and Herrera, R.: Phytomass structure of natural plant communities on spodosols in southern Venezuela: the tall Amazon caatinga forest, Vegetatio, 53, 65-84, 1983.	http://www.jstor.org/stable/20145960
van der Sande et al. 2015	van der Sande, M. T., Zuidema, P. A., and Sterck, F.: Explaining biomass growth of tropical canopy trees: the importance of sapwood, Oecologia, 177, 1145-1155, 2015.	10.1007/s00442-015-3220-y
