# Supplementary material for: Linking hydraulic traits to tropical forest function in a size-structured and trait-driven model (TFS v.1-Hydro)
Source: Copernicus journal article supplement (doi:10.5194/gmd-9-4227-2016), 2016-11-24
Supplement: Supplementary file 1 [file gmd-9-4227-2016-supplement.zip › sapwood_PV_recal_corrected.csv]

genus	species	ref	biome	WD	C	pinot	pitlp	rttlp	epsil	apopl	C_published
Holocalyx	balansae	Carrasco et al. 2014	STF	0.858303343407893	22.7026292800399	-0.755833847368165	-0.836263696697004	0.0428893000052584	7.86564286420867	0.766836628012012	81.5
Parapiptadenia	rigida	Carrasco et al. 2014	STF	0.757215075158478	17.2920521471486	-0.667078855846887	-0.738389516310461	0.0251194615637767	6.9124008017967	0.853163596453207	52.5
Lonchocarpus	muehlbergianus	Carrasco et al. 2014	STF	0.697730064469991	16.3626341845235	-0.759075551552377	-0.834566827896513	0.0249680003313621	8.39168874348463	0.850709544827534	51.5
Balfourodendron	riedelianum	Carrasco et al. 2014	STF	0.659035123275932	13.8476608171984	-1.50419515876025	-1.7657038879231	0.0427421552799183	10.15831511688	0.803651323383845	97
Chrysophyllum	gonocarpum	Carrasco et al. 2014	STF	0.595045690004608	22.1760080230559	-1.15550035359666	-1.34431763472748	0.0485842134803662	8.27163883173163	0.793571076659092	164.5
Cordia	trichotoma	Carrasco et al. 2014	STF	0.508058825977261	19.4722257238316	-1.98372880365565	-2.34551371510379	0.0681583945081251	12.8642247792122	0.699279139353442	160.5
Cabralea	canjerana	Carrasco et al. 2014	STF	0.528022175334333	54.8872582064034	-0.901121086809257	-1.03723962061561	0.0866363923558029	6.88020963528509	0.617323407750988	300.5
Ocotea	diospyrifolia	Carrasco et al. 2014	STF	0.540559839341336	32.611835836038	-1.63715404190697	-1.93547767051846	0.0972584483907948	10.6216028078575	0.569150229278642	444
Cedrela	fissilis	Carrasco et al. 2014	STF	0.491526272715924	103.215641710718	-0.528824145707846	-0.609459516310461	0.0923960804081191	4.14437238569137	0.430434720981241	395
Ceiba	speciosa	Carrasco et al. 2014	STF	0.308272749830849	262.033641643268	-0.506830785429672	-0.560636897433275	0.183672822773815	5.28121588734564	0.115183817718283	871.5
Schefflera	morototoni	Meinzer et al. 2008	TMF	0.279688601043239	200.862123633737	-0.76162064511185	-0.86	0.211076244141507	6.65783746539985	0.178389938692247	415.747304723757
Anacardium	excelsum	Meinzer et al. 2008	TMF	0.390097711847833	142.962586343781	-1.16986601036672	-1.32505027780618	0.253696535542071	9.98897186943953	0.285375178524448	301.560719899256
Ficus	insipida	Meinzer et al. 2008	TMF	0.400137311894604	82.2427370462897	-1.40202623701214	-1.6250127824931	0.180560404825556	10.2172557165788	0.402732460189927	261.954981979754
Cordia	alliodora	Meinzer et al. 2008	TMF	0.520247451141489	51.4286850535388	-2.50714251037317	-2.94416607015032	0.228661814274759	16.8902654031655	0.32311761596608	82.6595875676341
Manilkara	bidentata	Meinzer et al. 2008	TWF	0.665210732885423	31.1834429918103	-2.20795562635012	-2.56580427446569	0.140852598524297	15.8312236576901	0.312476864375237	153.678913673554
Protium	panamense	Meinzer et al. 2008	TWF	0.598816758466618	NA	NA	NA	NA	NA	NA	282.593673719207
Tachigalia	versicolor	Meinzer et al. 2008	TWF	0.579184986129119	NA	NA	NA	NA	NA	NA	299.053096347007
Tapirira	guianensis	Meinzer et al. 2008	TWF	0.520305811283582	54.5031192169799	-1.45454334040815	-1.64546477144902	0.135444296869554	12.5360459123887	0.371048312006798	335.344102366173
Vochysia	ferruginea	Meinzer et al. 2008	TWF	0.436962975456663	NA	NA	NA	NA	NA	NA	405.548249040524
Trattinnickia	aspera	Meinzer et al. 2008	TWF	0.540195858292469	97.0322374551814	-0.829903591857683	-0.929645157991615	0.13894375985528	7.73514880179809	0.167845164125352	409.488489910628
Vochysia	thyrsoidea	Scholz et al. 2007	TS	0.41993281075028	NA	NA	NA	NA	NA	NA	157.136465324385
Kielmeyera	coriaceae	Scholz et al. 2007	TS	0.499888017917133	NA	NA	NA	NA	NA	NA	107.38255033557
Byrsonima	crassa	Scholz et al. 2007	TS	0.529675251959686	NA	NA	NA	NA	NA	NA	83.0425055928412
Schefflera	macrocarpa	Scholz et al. 2007	TS	0.539473684210526	55.5879721081836	-1.33710419591433	-1.56365681562532	0.133787173337021	9.22863788469921	0.287988876883843	84.8322147651007
Blepharocalyx	salicifolius	Scholz et al. 2007	TS	0.55946248600224	67.5385527416335	-1.35462642894473	-1.56365681562532	0.165863069876118	10.1333154565813	0.295296579184023	73.1991051454139
Qualea	parviflora	Scholz et al. 2007	TS	0.569652855543113	89.4334197891179	-1.29544381982286	-1.49207485427958	0.211779558115113	9.830081777427	0.254960264355926	67.2930648769575
Caryocar	brasiliense	Scholz et al. 2007	TS	0.589641657334826	73.8222680863448	-1.25875245943101	-1.31823294815421	0.157693167160521	27.8970297859188	0.0834750118918533	40.4474272930649
Sclerolobium	paniculatum	Scholz et al. 2007	TS	0.61942889137738	NA	NA	NA	NA	NA	NA	38.2997762863535
Schefflera	morototoni	Tyree et al. 1991	TMF	0.456	NA	NA	NA	NA	NA	NA	400
Schefflera	morototoni	Tyree et al. 1991	TMF	0.456	122.742189293121	-0.769733377783877	-0.861749918063319	0.150268016800774	7.2086787138643	0.267103054443155	400
Ochroma	pyramidale	Machado & Tyree 1994	TMF	0.19	251.41288176288	-0.69373493704848	-0.882677991407688	0.253149326616485	3.240894791714	0.219168736661892	625
Pseudobombax	septenatum	Machado & Tyree 1994	TMF	0.25	111.716348106252	-0.984171669367811	-1.13759518167599	0.15171743267672	7.29737529907376	0.423891756280627	416.666666666667
Anacardium	excelsum	McCulloh et al. 2012	TMF	0.38	NA	NA	NA	NA	NA	NA	610
Miconia	argentea	McCulloh et al. 2012	TMF	0.54	NA	NA	NA	NA	NA	NA	212
Anacardium	excelsum	Johnson et al. 2013	TMF	0.43	NA	NA	NA	NA	NA	NA	346
Spondias	purpurea	Borchert & Pockman 2005	TDF	0.33	11.0149604985147	-1.43389100831862	-1.5238789460803	0.0213633208671181	24.2818801375078	0.63822801480375	NA
Albizia	guachapele	Borchert & Pockman 2005	TDF	0.513	11.9098403750792	-1.96698741111514	-2.1576697004551	0.0385337416167775	22.2574899474439	0.563970586783475	NA
Calycophyllum	candidissimum	Borchert & Pockman 2005	TDF	0.697	5.67949118406449	-2.61794355026655	-2.90400403589644	0.0301300457809689	26.5766123516948	0.694128413587032	NA
Simarouba	glauca	Borchert & Pockman 2005	TDF	0.464535058787231	14.294967987089	-1.83106848411528	-2.08038158740774	0.0425844116921713	15.2792657478879	0.644656358510518	NA
Adansonia	rubrostipa	Chapotin et al. 2006	TDF	0.1	NA	NA	NA	NA	NA	NA	1086.8
Adansonia	za	Chapotin et al. 2006	TDF	0.12	NA	NA	NA	NA	NA	NA	869
