# Supplementary material for: Linking hydraulic traits to tropical forest function in a size-structured and trait-driven model (TFS v.1-Hydro)
Source: Copernicus journal article supplement (doi:10.5194/gmd-9-4227-2016), 2016-11-24
Supplement: Supplementary file 1 [file gmd-9-4227-2016-supplement.zip › sapwood_PV_recal_headers.csv]

column	units	description
genus		genus (uncleaned)
species		species (uncleaned)
ref		reference
biome		TWF = Tropical Wet Forest; TMF = Tropical Moist Forest; TDF = Tropical Dry Forest; TS = Tropical Savanna; STF = Subtropical Forest
WD	g.cm-3	wood density
C	kg.m-3.MPa-1	sapwood capacitance (recalculated from digitized PV curve)
pinot	MPa	sapwood osmotic potential at full turgor
pitlp	MPa	sapwood osmotic potential at zero turgor
rttlp	0-1	sapwood relative water deficit (1 - relative water content) at turgor loss point
epsil	MPa	sapwood bulk elastic modulus
apopl	0-1	sapwood apoplastic fraction (fraction of water outside cells)
C_published	MPa	sapwood capacitance (published value)
