# Supplementary material for: Linking hydraulic traits to tropical forest function in a size-structured and trait-driven model (TFS v.1-Hydro)
Source: Copernicus journal article supplement (doi:10.5194/gmd-9-4227-2016), 2016-11-24
Supplement: Supplementary file 1 [file gmd-9-4227-2016-supplement.zip › sapwood_PV_recal_uncorrected.csv]

genus	species	ref	biome	WD	C	pinot	pitlp	rttlp	epsil	apopl	C_published
Holocalyx	balansae	Carrasco et al. 2014	STF	0.858303343407893	64.7982663356901	-0.369514986330326	-0.473229355511208	0.0499655066713159	1.08643683196528	0.77121433947088	81.5
Parapiptadenia	rigida	Carrasco et al. 2014	STF	0.757215075158478	42.1057533778312	-0.324788852126024	-0.395625136233856	0.0256964637248865	1.35148112757177	0.854294521787214	52.5
Lonchocarpus	muehlbergianus	Carrasco et al. 2014	STF	0.697730064469991	54.821748469372	-0.392779346434946	-0.665946096464063	0.0600546700868325	0.80514560268157	0.852077998386876	51.5
Balfourodendron	riedelianum	Carrasco et al. 2014	STF	0.659035123275932	72.5220606126052	-0.319127764742061	-0.411554339306701	0.0436642697935238	1.12255849401369	0.804831291923151	97
Chrysophyllum	gonocarpum	Carrasco et al. 2014	STF	0.595045690004608	112.812978956043	-0.294674531601174	-0.672414121899765	0.0989696516697872	0.317502045565086	0.800034644022236	164.5
Cordia	trichotoma	Carrasco et al. 2014	STF	0.508058825977261	124.806108354242	-0.351488056344829	-0.471560903991839	0.0748135283105069	1.22824956924512	0.701817904602221	160.5
Cabralea	canjerana	Carrasco et al. 2014	STF	0.528022175334333	205.443230497262	-0.275477281084986	-0.35133452377253	0.0711883875221104	0.838587617057691	0.626187109887729	300.5
Ocotea	diospyrifolia	Carrasco et al. 2014	STF	0.540559839341336	308.249383975049	-0.291123457684333	-0.584976722744028	0.215070619825092	0.316434601662433	0.571856700934559	444
Cedrela	fissilis	Carrasco et al. 2014	STF	0.491526272715924	305.038844016778	-0.277939713243989	-0.370049373675222	0.135755466491833	0.865632456899241	0.430434720981241	395
Ceiba	speciosa	Carrasco et al. 2014	STF	0.308272749830849	699.546417847526	-0.248301710277799	-0.322243270865429	0.203217832614505	0.690775546723055	0.116752712074273	871.5
Schefflera	morototoni	Meinzer et al. 2008	TMF	0.279688601043239	757.483011337559	-0.301219795319832	-0.531558655710034	0.34960157055519	0.340090275619108	0.193215853531509	415.747304723757
Anacardium	excelsum	Meinzer et al. 2008	TMF	0.390097711847833	391.855213884223	-0.445974227363733	-0.572125508042088	0.146420557949268	0.693240874875225	0.335948587647556	301.560719899256
Ficus	insipida	Meinzer et al. 2008	TMF	0.400137311894604	381.151764462456	-0.382634093950515	-0.468835282306127	0.103775205608167	0.627225198154369	0.435582284353584	261.954981979754
Cordia	alliodora	Meinzer et al. 2008	TMF	0.520247451141489	261.782842194465	-0.527194893415651	-0.7523411739901	0.190835769989348	0.860689905374124	0.362309664335693	82.6595875676341
Manilkara	bidentata	Meinzer et al. 2008	TWF	0.665210732885423	203.299164645778	-0.57516524543428	-1.25987206304907	0.373458723230293	0.660173491529108	0.31282966666103	153.678913673554
Protium	panamense	Meinzer et al. 2008	TWF	0.598816758466618	NA	NA	NA	NA	NA	NA	282.593673719207
Tachigalia	versicolor	Meinzer et al. 2008	TWF	0.579184986129119	NA	NA	NA	NA	NA	NA	299.053096347007
Tapirira	guianensis	Meinzer et al. 2008	TWF	0.520305811283582	344.180247301348	-0.26348249933088	-0.822264124143729	0.427413328426079	0.387722496444061	0.371048312006798	335.344102366173
Vochysia	ferruginea	Meinzer et al. 2008	TWF	0.436962975456663	NA	NA	NA	NA	NA	NA	405.548249040524
Trattinnickia	aspera	Meinzer et al. 2008	TWF	0.540195858292469	376.337928035096	-0.393240045411857	-0.817924708991174	0.432073261309361	0.617632030702494	0.167845164125352	409.488489910628
Vochysia	thyrsoidea	Scholz et al. 2007	TS	0.41993281075028	351.249595139162	-0.3976040622502	-1.04519403816003	0.456351420691508	0.479924974866427	0.263460211003889	157.136465324385
Kielmeyera	coriaceae	Scholz et al. 2007	TS	0.499888017917133	588.010912542057	-0.359459315701084	-0.592966953711969	0.262085829290722	0.17147925687826	0.334461874012231	107.38255033557
Byrsonima	crassa	Scholz et al. 2007	TS	0.529675251959686	331.870066120255	-0.393007708802818	-0.91410998719204	0.40452820459242	0.488692338971326	0.290382546278953	83.0425055928412
Schefflera	macrocarpa	Scholz et al. 2007	TS	0.539473684210526	195.109585976594	-0.483589887403001	-0.66293473098671	0.192621562178627	1.70798016916118	0.287988876883843	84.8322147651007
Blepharocalyx	salicifolius	Scholz et al. 2007	TS	0.55946248600224	332.397375580517	-0.396030101235826	-0.89959077001042	0.38888845216411	0.431182727226877	0.305266507446258	73.1991051454139
Qualea	parviflora	Scholz et al. 2007	TS	0.569652855543113	463.837084542863	-0.392132985601995	-0.497020263085615	0.152459001931581	0.484378028354298	0.277555723937647	67.2930648769575
Caryocar	brasiliense	Scholz et al. 2007	TS	0.589641657334826	151.907864211566	-0.92093490386484	-1.35133909735765	0.290281593199296	2.35114974985381	0.0886035218427126	40.4474272930649
Sclerolobium	paniculatum	Scholz et al. 2007	TS	0.61942889137738	205.395659006266	-0.409949328209942	-0.699257945288558	0.226820044839018	0.896264182519567	0.451776721668503	38.2997762863535
Schefflera	morototoni	Tyree et al. 1991	TMF	0.456	NA	-0.66277357246603	-1.03710463349505	0.126045951274783	1.80900142827202	0.650782813103949	400
Schefflera	morototoni	Tyree et al. 1991	TMF	0.456	102.494217520406	-0.769733377783877	-0.861749918063319	0.125479290283457	7.2086787138643	0.274895093226493	400
Ochroma	pyramidale	Machado & Tyree 1994	TMF	0.19	251.41288176288	-0.69373493704848	-0.882677991407688	0.253149326616485	3.22321072191924	0.219168736661892	625
Pseudobombax	septenatum	Machado & Tyree 1994	TMF	0.25	111.716348106252	-0.984171669367811	-1.13759518167599	0.15171743267672	7.07488707317462	0.423891756280627	416.666666666667
Anacardium	excelsum	McCulloh et al. 2012	TMF	0.38	NA	NA	NA	NA	NA	NA	610
Miconia	argentea	McCulloh et al. 2012	TMF	0.54	NA	NA	NA	NA	NA	NA	212
Anacardium	excelsum	Johnson et al. 2013	TMF	0.43	NA	NA	NA	NA	NA	NA	346
Spondias	purpurea	Borchert & Pockman 2005	TDF	0.33	NA	-1.43590077294335	-1.5238789460803	0.02086753156268	24.2728445434823	0.638551348917706	NA
Albizia	guachapele	Borchert & Pockman 2005	TDF	0.513	NA	-2.02097550349533	-2.1576697004551	0.0272025616386651	21.6638721063256	0.570617156192943	NA
Calycophyllum	candidissimum	Borchert & Pockman 2005	TDF	0.697	NA	-2.6675045916348	-2.90400403589644	0.0245868144233529	26.0835155280523	0.698095661331608	NA
Simarouba	glauca	Borchert & Pockman 2005	TDF	0.464535058787231	NA	-1.91604232316396	-2.08038158740773	0.0272549207556201	14.6042934809413	0.654978160166623	NA
Adansonia	rubrostipa	Chapotin et al. 2006	TDF	0.1	1086.8	-0.2	-0.22	0.06	0.241538461538462	0.339999999999999	1086.8
Adansonia	za	Chapotin et al. 2006	TDF	0.12	869	-0.25	-0.32	0.15	0.305272727272727	0.314285714285714	869
