# Supplementary material for: Linking hydraulic traits to tropical forest function in a size-structured and trait-driven model (TFS v.1-Hydro)
Source: Copernicus journal article supplement (doi:10.5194/gmd-9-4227-2016), 2016-11-24
Supplement: Supplementary file 1 [file gmd-9-4227-2016-supplement.zip › sapwood_PV_references.xlsx]

## Sheet: sapwood_PV_references
Reference	Full Citation	DOI
Carrasco et al. 2014	Oliva Carrasco L, Bucci SJ, Di Francescantonio D, Lezcano OA, Campanello PI, Scholz FG, Rodriguez S, Madanes N, Cristiano PM, Hao GY, et al. 2015. Water storage dynamics in the main stem of subtropical tree species differing in wood density, growth rate and life history traits. Tree Physiol 35(4): 354-365.	10.1093/treephys/tpu087
Meinzer et al. 2003	Meinzer FC, James SA, Goldstein G, Woodruff DR. 2003. Whole-tree water transport scales with sapwood capacitance in tropical forest canopy trees. Plant, Cell & Environment 26: 1147-1155.	10.1046/j.1365-3040.2003.01039.x
Meinzer et al. 2008	Meinzer FC, Woodruff DR, Domec JC, Goldstein G, Campanello PI, Gatti MG, Villalobos-Vega R. 2008. Coordination of leaf and stem water transport properties in tropical forest trees. Oecologia 156(1): 31-41.	10.1007/s00442-008-0974-5
Scholz et al. 2007	Scholz FG, Bucci SJ, Goldstein G, Meinzer FC, Franco AC, Miralles-Wilhelm F. 2007. Biophysical properties and functional significance of stem water storage tissues in Neotropical savanna trees. Plant Cell and Environment 30(2): 236-248.	10.1111/j.1365-3040.2006.01623.x
Tyree et al. 1991	Tyree MT, Snyderman DA, Wilmot TR, Machado J-L. 1991. Water relations and hydraulic architecture of a tropical tree (Schefflera morototoni). Plant Physiology 96: 1105-1113.	http://www.jstor.org/stable/4273731
Machado & Tyree 1994	Machado J-L, Tyree MT. 1994. Patterns of hydraulic architecture and water relations of two tropical canopy trees with contrasting leaf phenologies: Ochroma pyramidale and Pseudobombax septenatum. Tree Physiology 14: 219-240.	10.1093/treephys/14.3.219
McCulloh et al. 2012	McCulloh KA, Johnson DM, Meinzer FC, Voelker SL, Lachenbruch B, Domec J-C. 2012. Hydraulic architecture of two species differing in wood density: opposing strategies in co-occurring tropical pioneer trees. Plant, Cell & Environment 35(1): 116-125.	10.1111/j.1365-3040.2011.02421.x
Johnson et al. 2013	Johnson DM, Domec JC, Woodruff DR, McCulloh KA, Meinzer FC. 2013. Contrasting hydraulic strategies in two tropical lianas and their host trees. Am J Bot 100(2): 374-383.	10.3732/ajb.1200590
Borchert & Pockman 2005	Borchert R, Pockman WT. 2005. Water storage capacitance and xylem tension in isolated branches of temperate and tropical trees. Tree Physiology 25: 457-466.	10.1093/treephys/25.4.457
Chapotin et al. 2006	Chapotin SM, Razanameharizaka JH, Holbrook NM. 2006. Water relations of baobab trees (Adansonia spp. L.) during the rainy season: does stem water buffer daily water deficits? Plant, Cell and Environment 29(6): 1021-1032.	10.1093/treephys/25.4.457
