# Supplementary material for: Linking hydraulic traits to tropical forest function in a size-structured and trait-driven model (TFS v.1-Hydro)
Source: Copernicus journal article supplement (doi:10.5194/gmd-9-4227-2016), 2016-11-24
Supplement: Supplementary file 1 [file gmd-9-4227-2016-supplement.zip › XFT_headers.csv]

column	units	description
genus		genus (uncleaned)
species		species (uncleaned)
Plant.organ		S = stem; T = trunk; R = root; P = petiole
Growth.form		T = tree; S = shrub; L = Liana; G = grass; H = herb; C = Cactus
Height	m	actual height
P50	MPa	xylem water potential @ 50% loss of conductivity
P12	MPa	xylem water potential @ 12% loss of conductivity
P88minusP12	MPa	xylem water potential @ 88% loss of conductivity less that at 12% loss
P88	MPa	xylem water potential @ 88% loss of conductivity
Slope	percent.MPa-1	slope of percent loss of conductivity curve at P50
P50.method		DH = dehydration; CE = centrifuge; CA = cavitron; AD = air-injection double end; AS = air-injection single end; AE = acoustic emissions
Curve		curve shape: E = exponential; S = sigmoidal; O = other
Ks	kg.m-1.s-1.MPa-1	xylem maximum (or saturated) hydraulic conductivity
LASA	m2.cm-2	leaf to sapwood area ratio
Reference
LMA	g.m-2	leaf mass per area
WD	g.cm-3	wood density
Contributor.name
BBiome		Brad's classification: TWF = Tropical Wet Forest; TMF = Tropical Moist Forest; TDF = Tropical Dry Forest; TS = Tropical Savanna; STF = Subtropical Forest; TFF = Tropical Flooded Forest; TM = Tropical Mangrove; G = greenhouse
CBiome		Choat's classification: TRR = tropical rainforest, TRS = tropical seasonal forest (savanna), TMR = temperate rain forest, TMS = temperate seasonal forest, WDS = woodland/shrubland, DES = deserts, BOT = boreal-tundra
Group		Taxonomic group: angiosperm, gymnosperm
Location		Location
Country		Country
LAT	decimal degrees	latitude
LON	decimal degrees	longitude
ELEV	m	elevation
MAP	mm	mean annual precipitation, one estimate
MAPwc	mm	mean annual precipitaiton, second estimate
MAT	C	mean annual temperature
ET	mm	annual evapotranspiration
Aridity.Index	precipitation/temperature + 10	De Martonne's aridity index
Notes		Notes
RHav	%	mean monthly relative humidity
SUNav	hours	average monthly sunshine hours (as % of total possible at that location)
FRSsum	days	Average number of ground frost days per year (sum)
RHjan	%	mean monthly relative humidity - January
RHfeb	%	mean monthly relative humidity - February
RHmar	%	mean monthly relative humidity - March
RHapr	%	mean monthly relative humidity - April
RHmay	%	mean monthly relative humidity - May
RHjun	%	mean monthly relative humidity - June
RHjul	%	mean monthly relative humidity - July
RHaug	%	mean monthly relative humidity - August
RHsep	%	mean monthly relative humidity - September
RHoct	%	mean monthly relative humidity - October
RHnov	%	mean monthly relative humidity - November
RHdec	%	mean monthly relative humidity - December
SUNjan	hours	average monthly sunshine hours (as % of total possible at that location) - January
SUNfeb	hours	average monthly sunshine hours (as % of total possible at that location) - February
SUNmar	hours	average monthly sunshine hours (as % of total possible at that location) - March
SUNapr	hours	average monthly sunshine hours (as % of total possible at that location) - April
SUNmay	hours	average monthly sunshine hours (as % of total possible at that location) - May
SUNjun	hours	average monthly sunshine hours (as % of total possible at that location) - June
SUNjul	hours	average monthly sunshine hours (as % of total possible at that location) - July
SUNaug	hours	average monthly sunshine hours (as % of total possible at that location) - August
SUNsep	hours	average monthly sunshine hours (as % of total possible at that location) - September
SUNoct	hours	average monthly sunshine hours (as % of total possible at that location) - October
SUNnov	hours	average monthly sunshine hours (as % of total possible at that location) - November
SUNdec	hours	average monthly sunshine hours (as % of total possible at that location) - December
FRSjan	days	Average number of ground frost days per year (sum) - January
FRSfeb	days	Average number of ground frost days per year (sum) - February
FRSmar	days	Average number of ground frost days per year (sum) - March
FRSapr	days	Average number of ground frost days per year (sum) - April
FRSmay	days	Average number of ground frost days per year (sum) - May
FRSjun	days	Average number of ground frost days per year (sum) - June
FRSjul	days	Average number of ground frost days per year (sum) - July
FRSaug	days	Average number of ground frost days per year (sum) - August
FRSsep	days	Average number of ground frost days per year (sum) - September
FRSoct	days	Average number of ground frost days per year (sum) - October
FRSnov	days	Average number of ground frost days per year (sum) - November
FRSdec	days	Average number of ground frost days per year (sum) - December
PPT_jan	mm	mean monthly precipitation - January
PPT_feb	mm	mean monthly precipitation - February
PPT_mar	mm	mean monthly precipitation - March
PPT_apr	mm	mean monthly precipitation - April
PPT_may	mm	mean monthly precipitation - May
PPT_jun	mm	mean monthly precipitation - June
PPT_jul	mm	mean monthly precipitation - July
PPT_aug	mm	mean monthly precipitation - August
PPT_sep	mm	mean monthly precipitation - September
PPT_oct	mm	mean monthly precipitation - October
PPT_nov	mm	mean monthly precipitation - November
PPT_dec	mm	mean monthly precipitation - December
TEMP_jan	C	mean monthly air temperature - January
TEMP_feb	C	mean monthly air temperature - February
TEMP_mar	C	mean monthly air temperature - March
TEMP_apr	C	mean monthly air temperature - April
TEMP_may	C	mean monthly air temperature - May
TEMP_jun	C	mean monthly air temperature - June
TEMP_jul	C	mean monthly air temperature - July
TEMP_aug	C	mean monthly air temperature - August
TEMP_sep	C	mean monthly air temperature - September
TEMP_oct	C	mean monthly air temperature - October
TEMP_nov	C	mean monthly air temperature - November
TEMP_dec	C	mean monthly air temperature - December
