# Supplementary material for: Linking hydraulic traits to tropical forest function in a size-structured and trait-driven model (TFS v.1-Hydro)
Source: Copernicus journal article supplement (doi:10.5194/gmd-9-4227-2016), 2016-11-24
Supplement: Supplementary file 1 [file gmd-9-4227-2016-supplement.zip › XFT_new.csv]

genus	species	Plant.organ	Growth.form	Height	P50	P12	P88minusP12	P88	Slope	P50.method	Curve	Ks	LASA	Reference	LMA	WD	Contributor.name	BBiome	CBiome	Group	Location	Country	LAT	LON	ELEV	MAP	MAPwc	MAT	ET	Aridity.Index	Notes	RHav	SUNav	FRSsum	RHjan	RHfeb	RHmar	RHapr	RHmay	RHjun	RHjul	RHaug	RHsep	RHoct	RHnov	RHdec	SUNjan	SUNfeb	SUNmar
Aspidosperma	cruenta	S	T	29	NA	NA	NA	NA	NA			1.556485	1.1599999536	Meinzer et al. 2008	NA	NA	Christoffersen	TWF	TRR	Angiosperm	Parque Nacional San Lorenzo	Panama	9.2833	-79.975	130	3100	3212	26.06	NA			83.7	49.8	0	80.3	73.5	75.9	79.1	86.3	86.7	86.7	88.8	87.6	89.1	87.5	82.5	56	65.2	61.9
Anacardium	excelsum	S	T	38	NA	NA	NA	NA	NA			NA	0.510001122002468	Meinzer et al. 2008	NA	0.391285714285714	Christoffersen	TWF	TRS	Angiosperm	Parque Natural Metropolitano, Panama City	Panama	9.1667	-79.85	50	1800	2614	26.54	NA			83.7	49.8	0	80.3	73.5	75.9	79.1	86.3	86.7	86.7	88.8	87.6	89.1	87.5	82.5	56	65.2	61.9
Cecropia	longipes	S	T	18	NA	NA	NA	NA	NA			NA	0.33999959200049	Meinzer et al. 2008	NA	NA	Christoffersen	TWF	TRS	Angiosperm	Parque Natural Metropolitano, Panama City	Panama	9.1667	-79.85	50	1800	2614	26.54	NA			83.7	49.8	0	80.3	73.5	75.9	79.1	86.3	86.7	86.7	88.8	87.6	89.1	87.5	82.5	56	65.2	61.9
Cordia	alliodora	S	T	26	NA	NA	NA	NA	NA			NA	0.65000065000065	Meinzer et al. 2008	NA	NA	Christoffersen	TWF	TRS	Angiosperm	Parque Natural Metropolitano, Panama City	Panama	9.1667	-79.85	50	1800	2614	26.54	NA			83.7	49.8	0	80.3	73.5	75.9	79.1	86.3	86.7	86.7	88.8	87.6	89.1	87.5	82.5	56	65.2	61.9
Luehea	seemannii	S	T	24	NA	NA	NA	NA	NA			8.761506	0.579999304000835	Meinzer et al. 2008	NA	0.417	Christoffersen	TWF	TRS	Angiosperm	Parque Natural Metropolitano, Panama City	Panama	9.1667	-79.85	50	1800	2614	26.54	NA			83.7	49.8	0	80.3	73.5	75.9	79.1	86.3	86.7	86.7	88.8	87.6	89.1	87.5	82.5	56	65.2	61.9
Schefflera	morototoni	S	T	22	NA	NA	NA	NA	NA			NA	0.45000045000045	Meinzer et al. 2008	NA	0.4559375	Christoffersen	TWF	TRS	Angiosperm	Parque Natural Metropolitano, Panama City	Panama	9.1667	-79.85	50	1800	2614	26.54	NA			83.7	49.8	0	80.3	73.5	75.9	79.1	86.3	86.7	86.7	88.8	87.6	89.1	87.5	82.5	56	65.2	61.9
Spondias	mombin	S	T	23	NA	NA	NA	NA	NA			NA	0.39000039000039	Meinzer et al. 2008	NA	0.3914375	Christoffersen	TWF	TRS	Angiosperm	Parque Natural Metropolitano, Panama City	Panama	9.1667	-79.85	50	1800	2614	26.54	NA			83.7	49.8	0	80.3	73.5	75.9	79.1	86.3	86.7	86.7	88.8	87.6	89.1	87.5	82.5	56	65.2	61.9
Amphipterygium	adstringens	S	T	NA	-0.96	NA	NA	NA	NA			5.36	NA	Mendez-Alonzo et al. 2012	40	0.48	Christoffersen	TDF	TRS	Angiosperm	Chamela Reserve, Jalisco State	Mexico	19.5	-105.05	70	731	774	26.23	NA			76.2	57.4	0.4	73.9	73.4	73.1	73	74.2	76.7	78.1	79.2	81.3	79.6	77.1	75.2	65.2	69.7	67.1
Apoplanesia	paniculata	S	T	NA	-4.61	NA	NA	NA	NA			0.99	NA	Mendez-Alonzo et al. 2012	53.99999999568	0.56	Christoffersen	TDF	TRS	Angiosperm	Chamela Reserve, Jalisco State	Mexico	19.5	-105.05	70	731	774	26.23	NA			76.2	57.4	0.4	73.9	73.4	73.1	73	74.2	76.7	78.1	79.2	81.3	79.6	77.1	75.2	65.2	69.7	67.1
Bursera	heteresthes	S	T	NA	-1.36	NA	NA	NA	NA			10.24	NA	Mendez-Alonzo et al. 2012	61.99999999256	0.4	Christoffersen	TDF	TRS	Angiosperm	Chamela Reserve, Jalisco State	Mexico	19.5	-105.05	70	731	774	26.23	NA			76.2	57.4	0.4	73.9	73.4	73.1	73	74.2	76.7	78.1	79.2	81.3	79.6	77.1	75.2	65.2	69.7	67.1
Bursera	instabilis	S	T	NA	-2.54	NA	NA	NA	NA			15.4	NA	Mendez-Alonzo et al. 2012	61.99999999256	0.4	Christoffersen	TDF	TRS	Angiosperm	Chamela Reserve, Jalisco State	Mexico	19.5	-105.05	70	731	774	26.23	NA			76.2	57.4	0.4	73.9	73.4	73.1	73	74.2	76.7	78.1	79.2	81.3	79.6	77.1	75.2	65.2	69.7	67.1
Caesalpinia	eriostachys	S	T	NA	-2.07	NA	NA	NA	NA			4.95	NA	Mendez-Alonzo et al. 2012	48.99999998873	0.85	Christoffersen	TDF	TRS	Angiosperm	Chamela Reserve, Jalisco State	Mexico	19.5	-105.05	70	731	774	26.23	NA			76.2	57.4	0.4	73.9	73.4	73.1	73	74.2	76.7	78.1	79.2	81.3	79.6	77.1	75.2	65.2	69.7	67.1
Caesalpinia	sclerocarpa	S	T	NA	-2.51	NA	NA	NA	NA			2.6	NA	Mendez-Alonzo et al. 2012	58.00000000116	0.71	Christoffersen	TDF	TRS	Angiosperm	Chamela Reserve, Jalisco State	Mexico	19.5	-105.05	70	731	774	26.23	NA			76.2	57.4	0.4	73.9	73.4	73.1	73	74.2	76.7	78.1	79.2	81.3	79.6	77.1	75.2	65.2	69.7	67.1
Cochlospermum	vitifolium	S	T	NA	NA	NA	NA	NA	NA			NA	NA	Mendez-Alonzo et al. 2012	64	0.27	Christoffersen	TDF	TRS	Angiosperm	Chamela Reserve, Jalisco State	Mexico	19.5	-105.05	70	731	774	26.23	NA			76.2	57.4	0.4	73.9	73.4	73.1	73	74.2	76.7	78.1	79.2	81.3	79.6	77.1	75.2	65.2	69.7	67.1
Cordia	alliodora	S	T	NA	-3.18	NA	NA	NA	NA			1.21	NA	Mendez-Alonzo et al. 2012	95.99999996928	0.63	Christoffersen	TDF	TRS	Angiosperm	Chamela Reserve, Jalisco State	Mexico	19.5	-105.05	70	731	774	26.23	NA			76.2	57.4	0.4	73.9	73.4	73.1	73	74.2	76.7	78.1	79.2	81.3	79.6	77.1	75.2	65.2	69.7	67.1
Cordia	elaeagnoides	S	T	NA	-1.15	NA	NA	NA	NA			1.59	NA	Mendez-Alonzo et al. 2012	53.99999999568	0.54	Christoffersen	TDF	TRS	Angiosperm	Chamela Reserve, Jalisco State	Mexico	19.5	-105.05	70	731	774	26.23	NA			76.2	57.4	0.4	73.9	73.4	73.1	73	74.2	76.7	78.1	79.2	81.3	79.6	77.1	75.2	65.2	69.7	67.1
Esenbeckia	nesiotica	S	T	NA	-4.74	NA	NA	NA	NA			0.43	NA	Mendez-Alonzo et al. 2012	99.0000000099	1.06	Christoffersen	TDF	TRS	Angiosperm	Chamela Reserve, Jalisco State	Mexico	19.5	-105.05	70	731	774	26.23	NA			76.2	57.4	0.4	73.9	73.4	73.1	73	74.2	76.7	78.1	79.2	81.3	79.6	77.1	75.2	65.2	69.7	67.1
Gliricidia	sepium	S	T	NA	-0.85	NA	NA	NA	NA			14.82	NA	Mendez-Alonzo et al. 2012	35.99999999712	0.64	Christoffersen	TDF	TRS	Angiosperm	Chamela Reserve, Jalisco State	Mexico	19.5	-105.05	70	731	774	26.23	NA			76.2	57.4	0.4	73.9	73.4	73.1	73	74.2	76.7	78.1	79.2	81.3	79.6	77.1	75.2	65.2	69.7	67.1
Heliocarpus	pallidus	S	T	NA	-0.66	NA	NA	NA	NA			9.67	NA	Mendez-Alonzo et al. 2012	50	0.55	Christoffersen	TDF	TRS	Angiosperm	Chamela Reserve, Jalisco State	Mexico	19.5	-105.05	70	731	774	26.23	NA			76.2	57.4	0.4	73.9	73.4	73.1	73	74.2	76.7	78.1	79.2	81.3	79.6	77.1	75.2	65.2	69.7	67.1
Haematoxylon	brasiletto	S	T	NA	NA	NA	NA	NA	NA			NA	NA	Mendez-Alonzo et al. 2012	63.00000001197	0.81	Christoffersen	TDF	TRS	Angiosperm	Chamela Reserve, Jalisco State	Mexico	19.5	-105.05	70	731	774	26.23	NA			76.2	57.4	0.4	73.9	73.4	73.1	73	74.2	76.7	78.1	79.2	81.3	79.6	77.1	75.2	65.2	69.7	67.1
Piptadenia	constricta	S	T	NA	-1.94	NA	NA	NA	NA			1.53	NA	Mendez-Alonzo et al. 2012	50	0.73	Christoffersen	TDF	TRS	Angiosperm	Chamela Reserve, Jalisco State	Mexico	19.5	-105.05	70	731	774	26.23	NA			76.2	57.4	0.4	73.9	73.4	73.1	73	74.2	76.7	78.1	79.2	81.3	79.6	77.1	75.2	65.2	69.7	67.1
Plumera	rubra	S	T	NA	NA	NA	NA	NA	NA			NA	NA	Mendez-Alonzo et al. 2012	71.00000001136	0.35	Christoffersen	TDF	TRS	Angiosperm	Chamela Reserve, Jalisco State	Mexico	19.5	-105.05	70	731	774	26.23	NA			76.2	57.4	0.4	73.9	73.4	73.1	73	74.2	76.7	78.1	79.2	81.3	79.6	77.1	75.2	65.2	69.7	67.1
[truncated: 45 more columns]
