# Supplementary material for: Linking hydraulic traits to tropical forest function in a size-structured and trait-driven model (TFS v.1-Hydro)
Source: Copernicus journal article supplement (doi:10.5194/gmd-9-4227-2016), 2016-11-24
Supplement: Supplementary file 1 [file gmd-9-4227-2016-supplement.zip › XFT_newreferences.xlsx]

## Sheet: SA_references
Reference	Full Citation	DOI
Meinzer et al. 2008	Meinzer, F. C., Campanello, P. I., Domec, J. C., Gatti, M. G., Goldstein, G., Villalobos-Vega, R., and Woodruff, D. R.: Constraints on physiological function associated with branch architecture and wood density in tropical forest trees, Tree Physiology, 28, 1609-1617, 2008.	10.1093/treephys/28.11.1609
Mendez-Alonzo et al. 2012	Mendez-Alonzo, R., Paz, H., Zuluaga, R. C., Rosell, J. A., and Olson, M. E.: Coordinated evolution of leaf and stem economics in tropical dry forest trees, Ecology, 93, 2397-2406, 2012.	10.1890/11-1213.1
